# Supplementary material for: Mutational scanning of CRX classifies clinical variants and reveals biochemical properties of the transcriptional effector domain
Source: PubMed Central journal article supplement — Genome Res. 2024 Oct;34(10):1540–52. doi: 10.1101/gr.279415.124 (PMC11529990; doi:10.1101/gr.279415.124), 2024-10
Supplement: Supplemental_Data_S1.pdf [file Supplemental_Data_S1.pdf]

Supplemental Data S1: Fluorescence distributions for the CRX DMS library integrated in LP+Reporter cells. Fluorescence distributions and gating strategies for the four replicates of the DMS library as measured reported by the Sony SY3200 fluorescence-activated cell sorter.

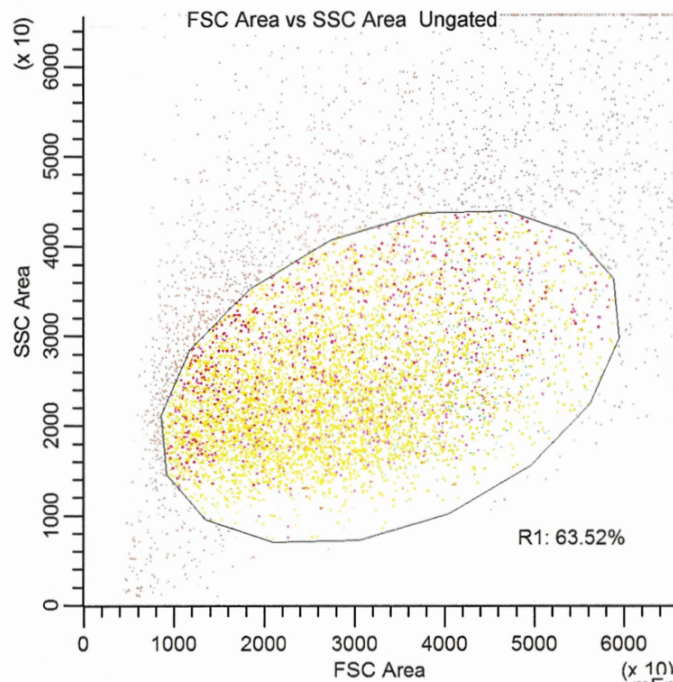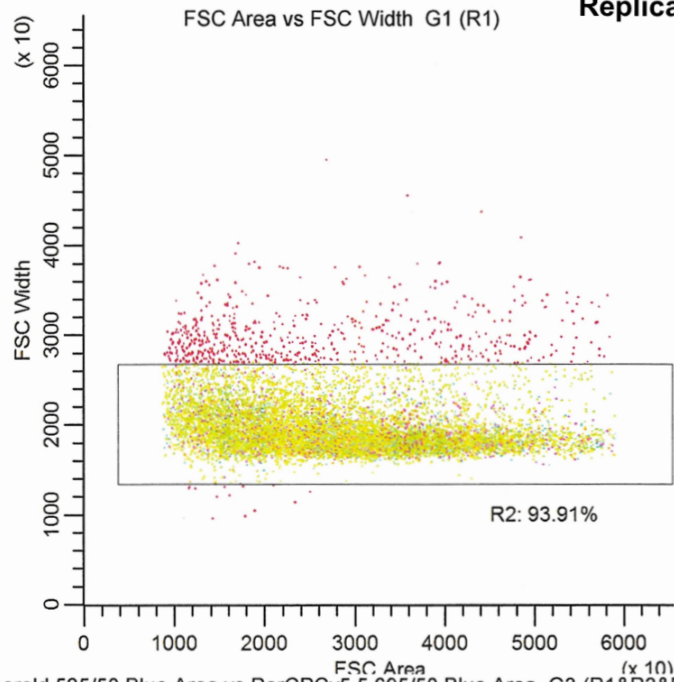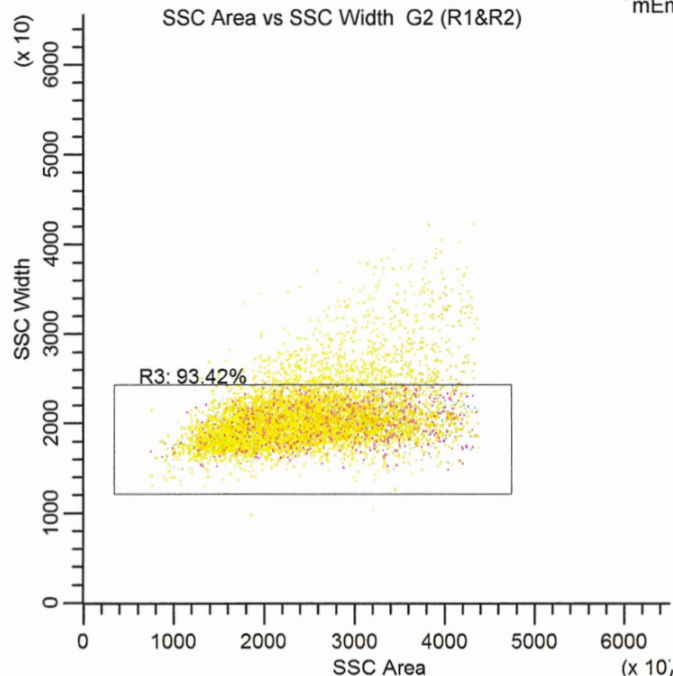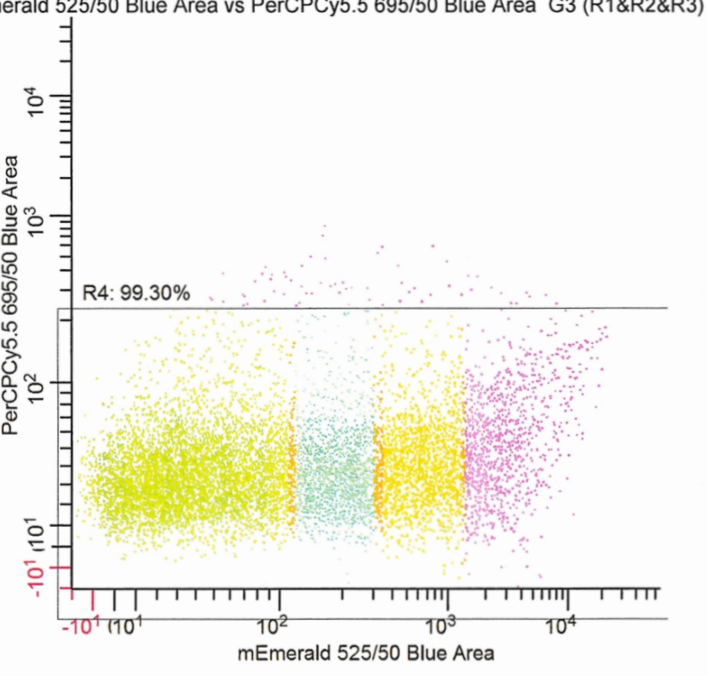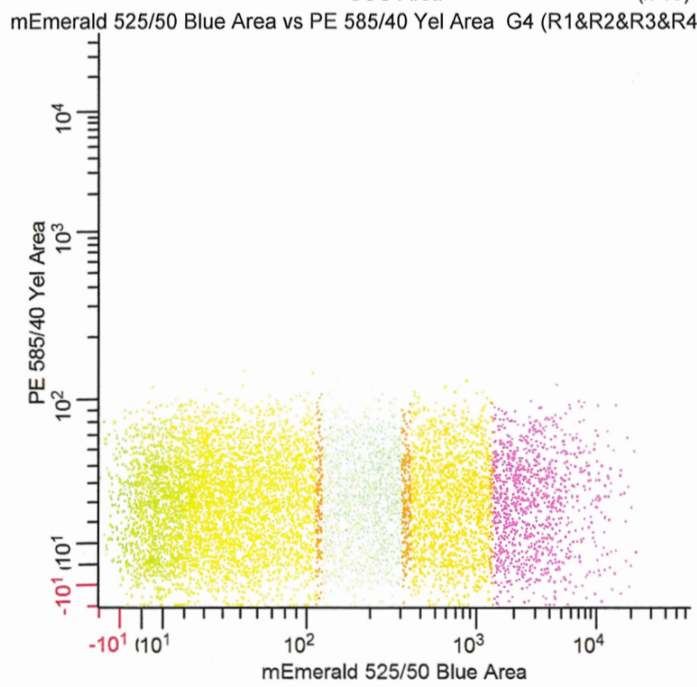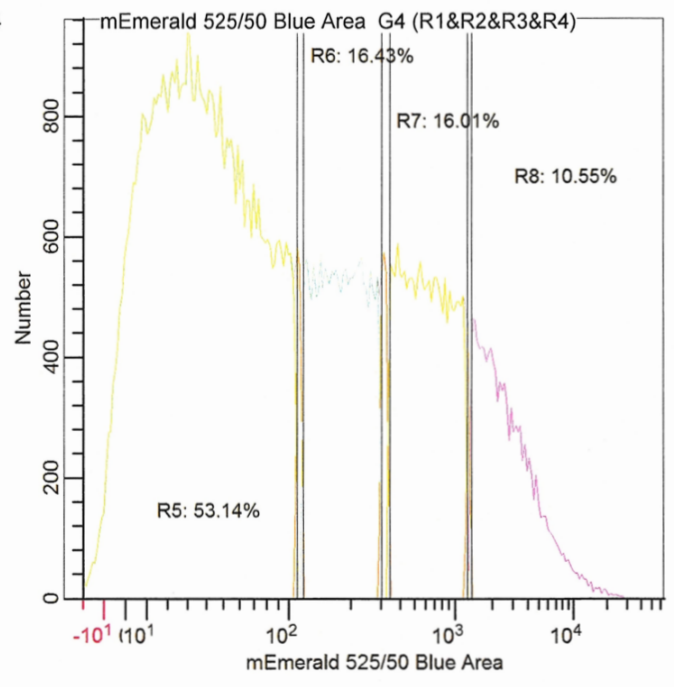

| Id | Percent | %Gate | geoMeanX | MedianX | LowX    | HighX    | geoMeanY |
|----|---------|-------|----------|---------|---------|----------|----------|
| R5 | 29.40   | 53.14 | 37.07    | 36.12   | -29.90  | 108.81   | n/a      |
| R6 | 9.09    | 16.43 | 179.85   | 180.54  | 116.09  | 301.65   | n/a      |
| R7 | 8.86    | 16.01 | 624.75   | 623.24  | 341.70  | 1265.27  | n/a      |
| R8 | 5.84    | 10.55 | 2836.04  | 2546.11 | 1357.29 | 63500.11 | n/a      |

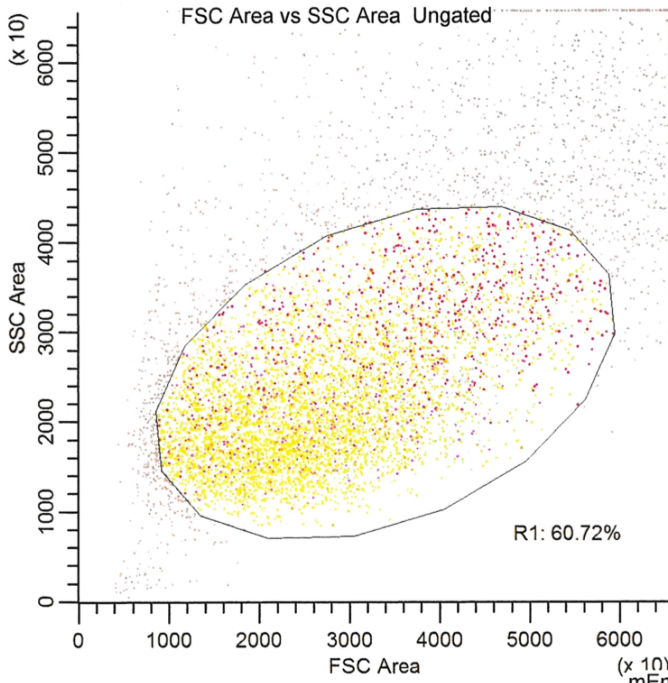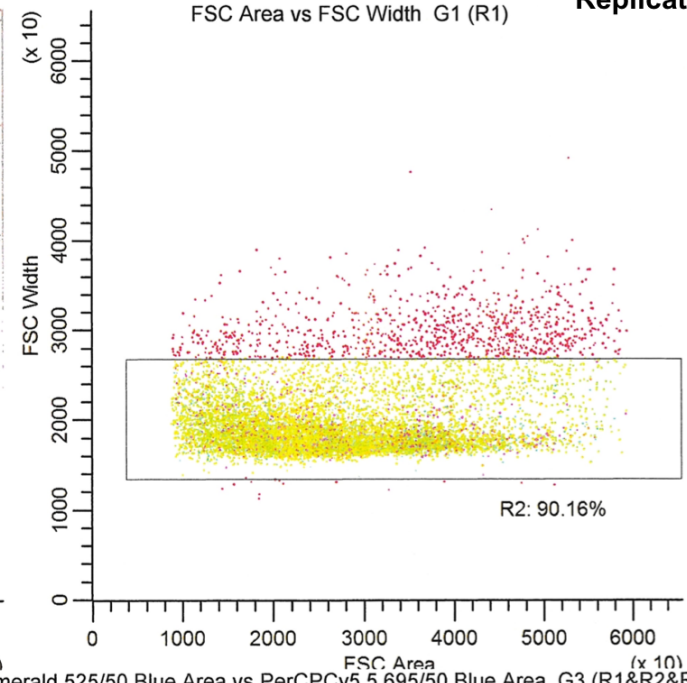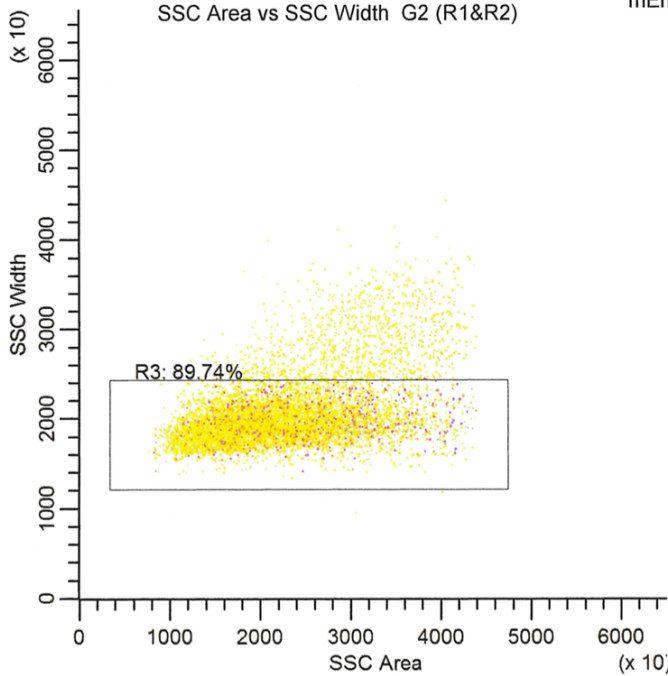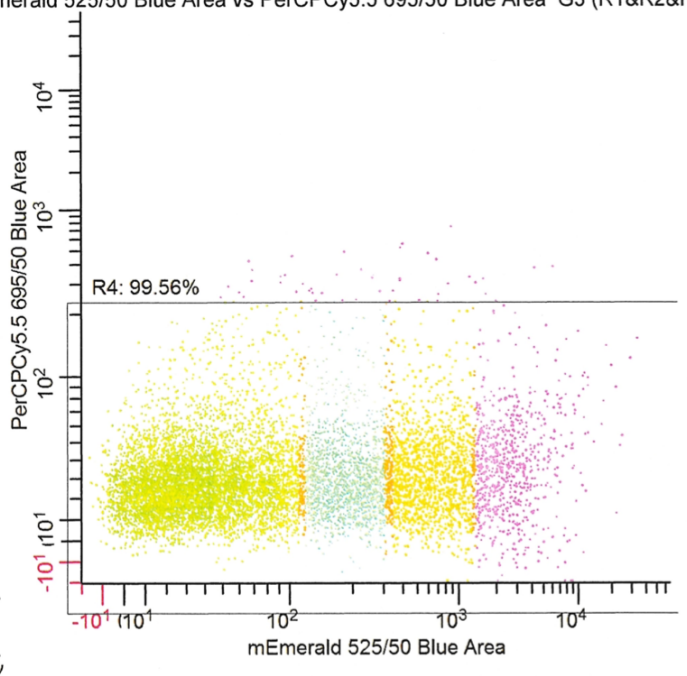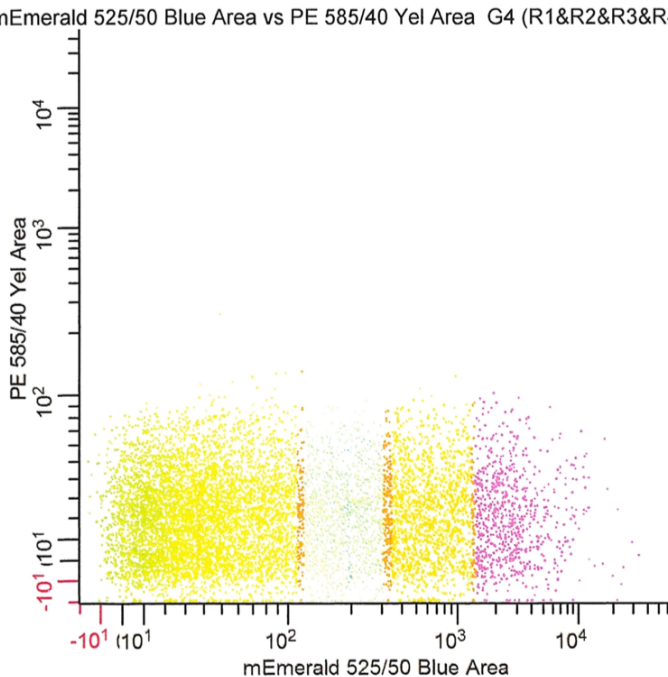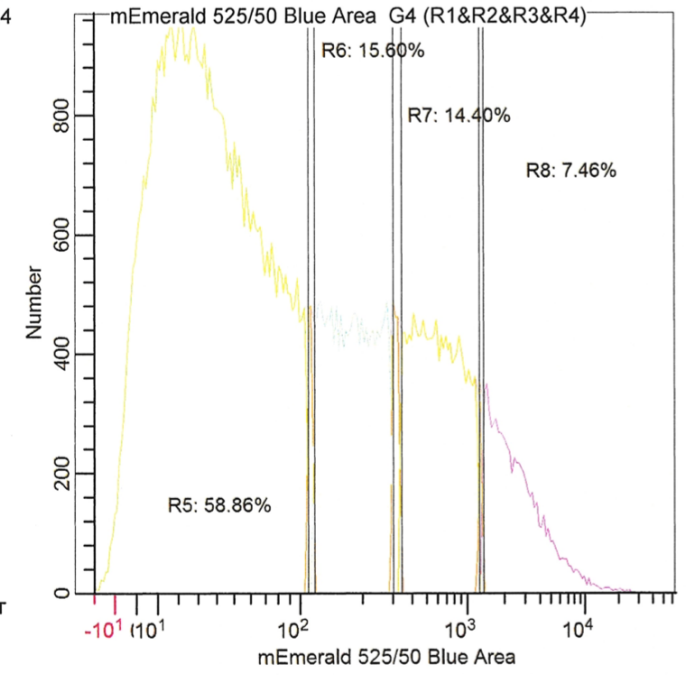

| Id | Percent | %Gate | geoMeanX | MedianX | LowX    | HighX    | geoMeanY |
|----|---------|-------|----------|---------|---------|----------|----------|
| R5 | 28.79   | 58.86 | 35.72    | 33.71   | -29.90  | 108.81   | n/a      |
| R6 | 7.63    | 15.60 | 179.40   | 179.86  | 116.09  | 301.65   | n/a      |
| R7 | 7.04    | 14.40 | 619.24   | 614.29  | 341.70  | 1265.27  | n/a      |
| R8 | 3.65    | 7.46  | 2659.13  | 2404.46 | 1357.29 | 63500.11 | n/a      |

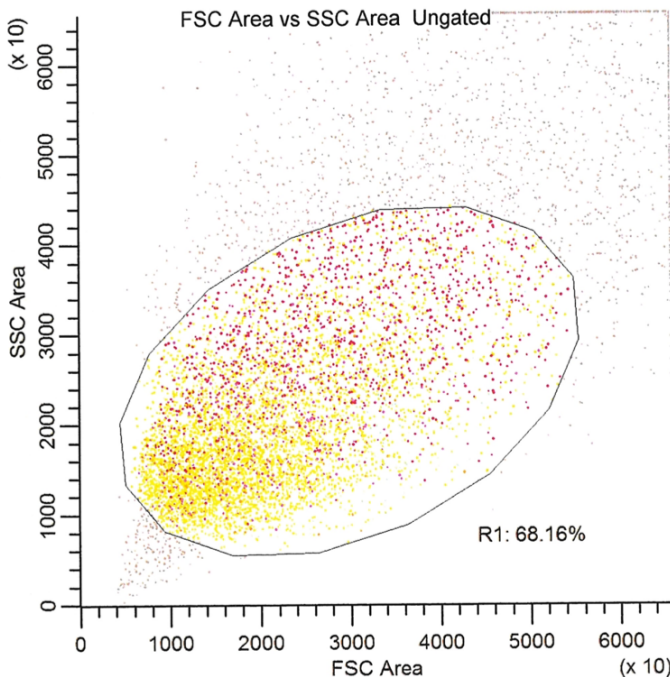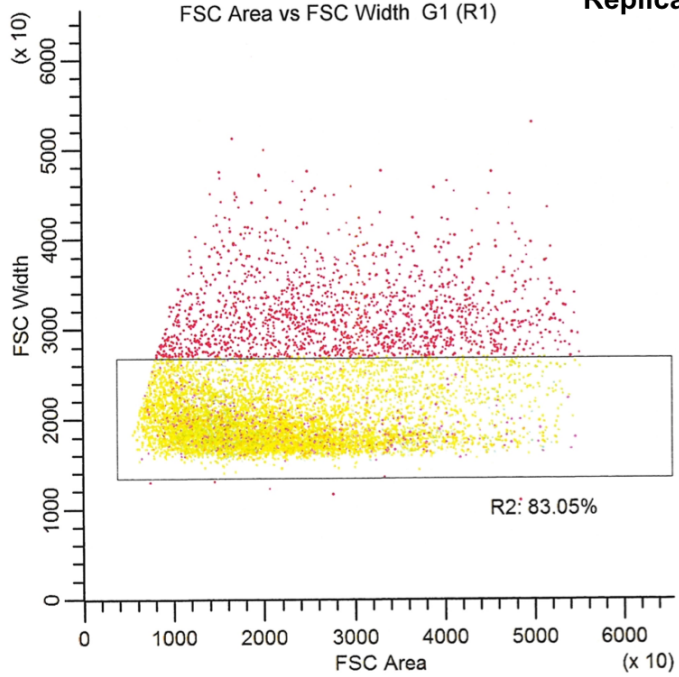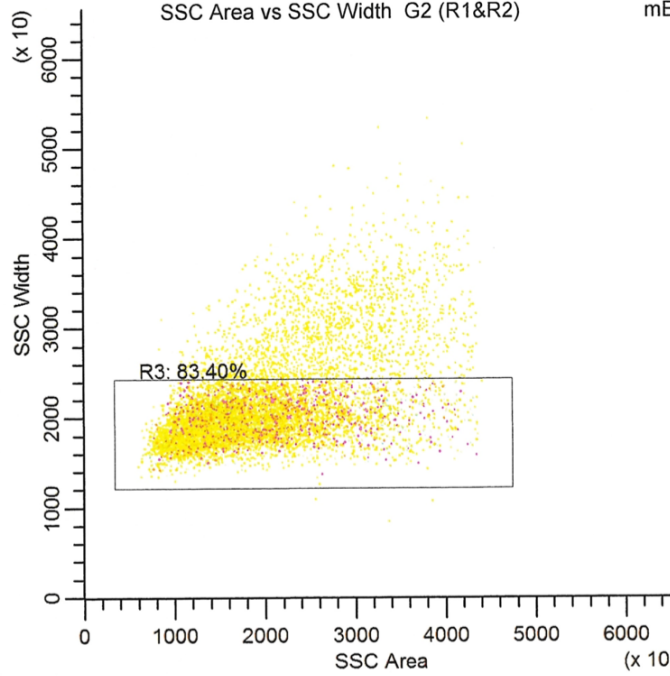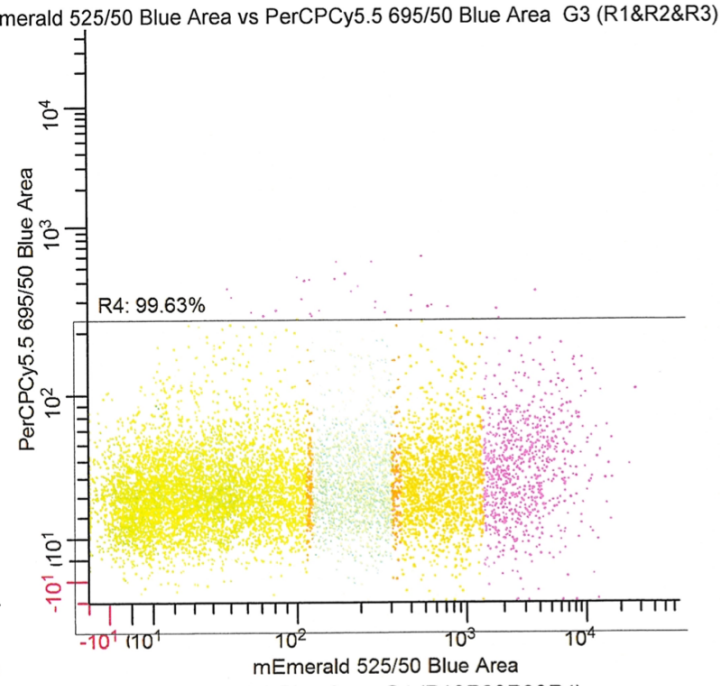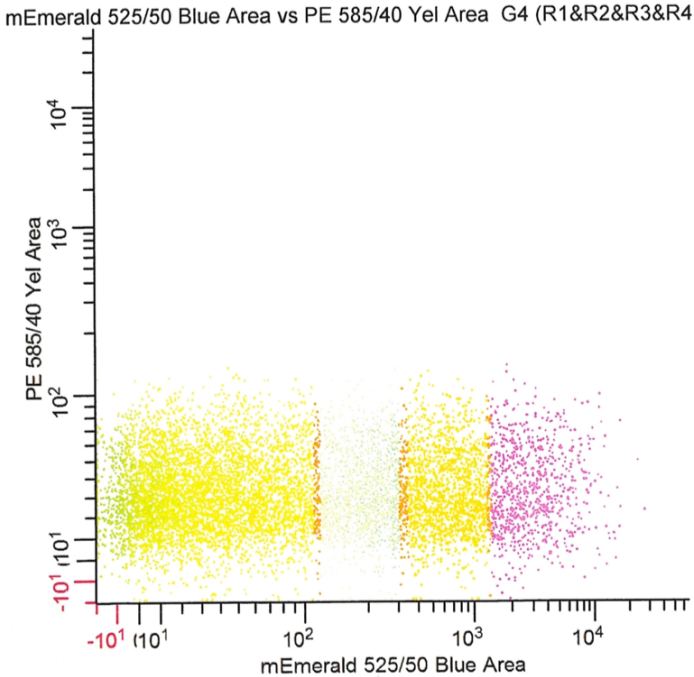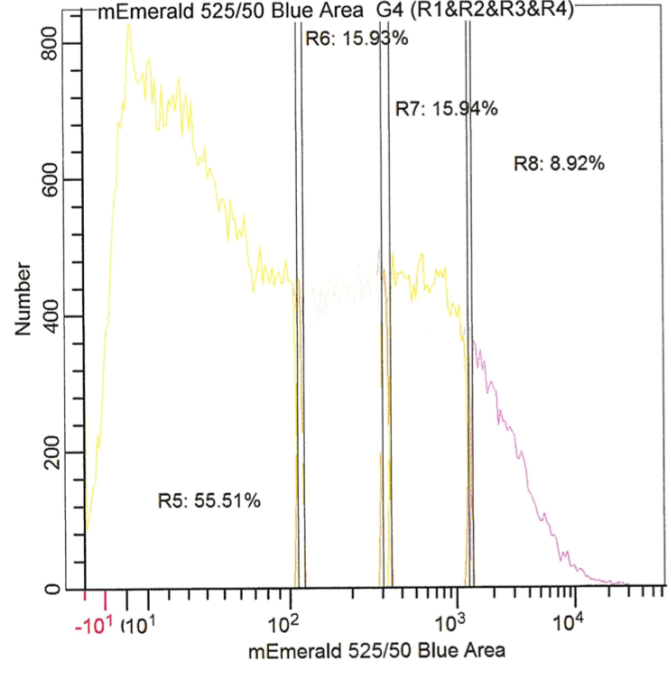

| Id | Percent | %Gate | geoMeanX | MedianX | LowX    | HighX    | geoMeanY |
|----|---------|-------|----------|---------|---------|----------|----------|
| R5 | 26.10   | 55.51 | 31.46    | 29.39   | -29.90  | 108.81   | n/a      |
| R6 | 7.49    | 15.93 | 181.46   | 182.74  | 116.09  | 301.65   | n/a      |
| R7 | 7.50    | 15.94 | 623.93   | 623.07  | 341.70  | 1265.26  | n/a      |
| R8 | 4.20    | 8.92  | 2723.14  | 2446.03 | 1357.29 | 63500.11 | n/a      |

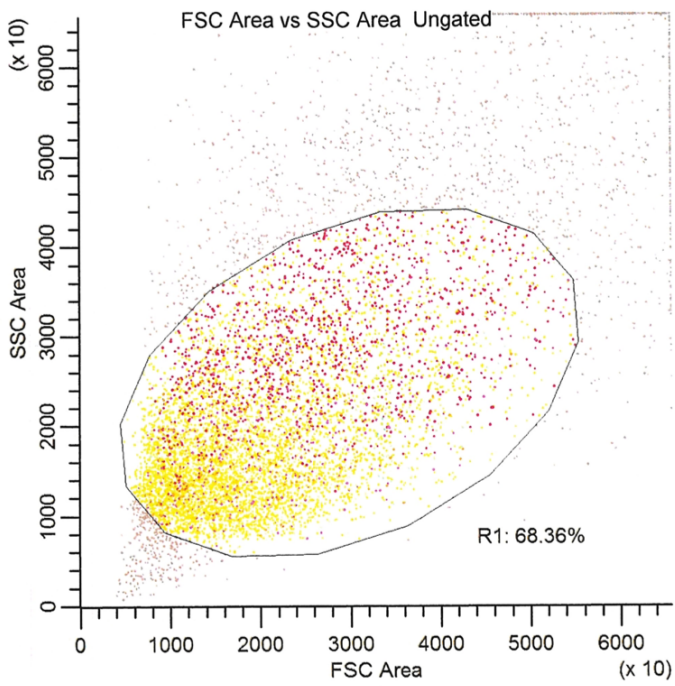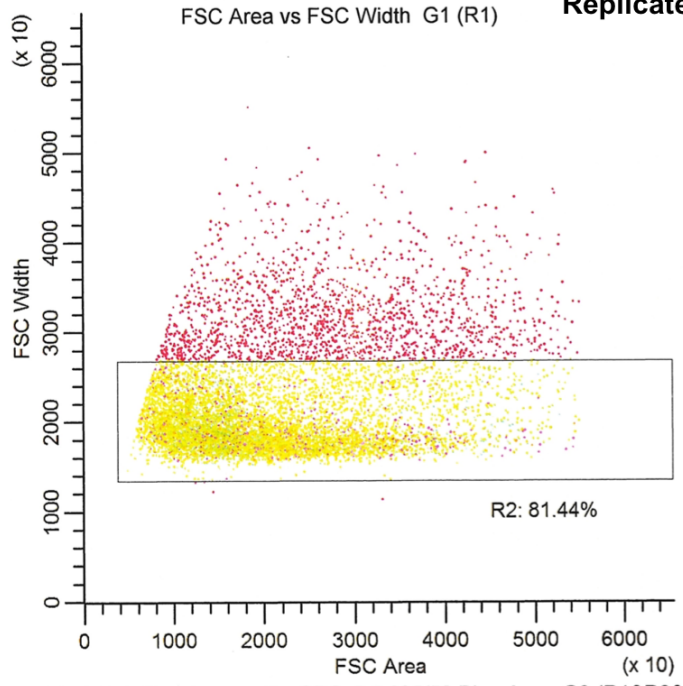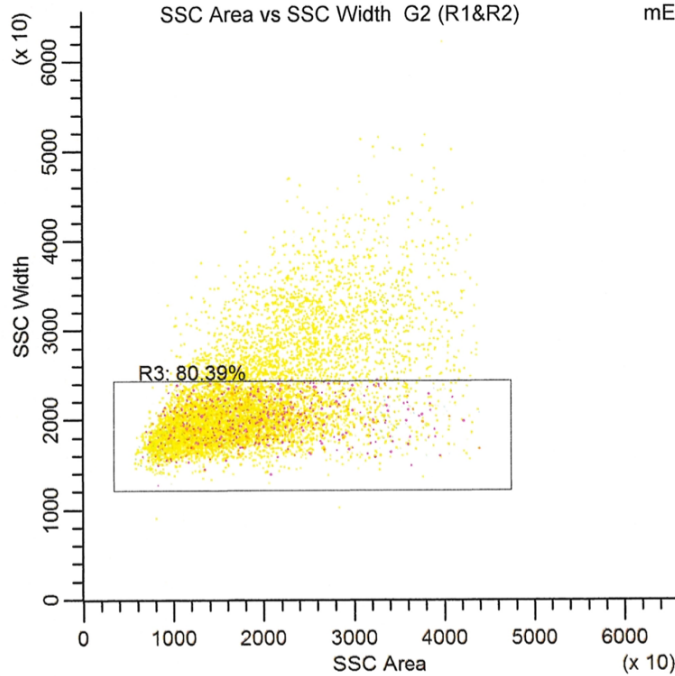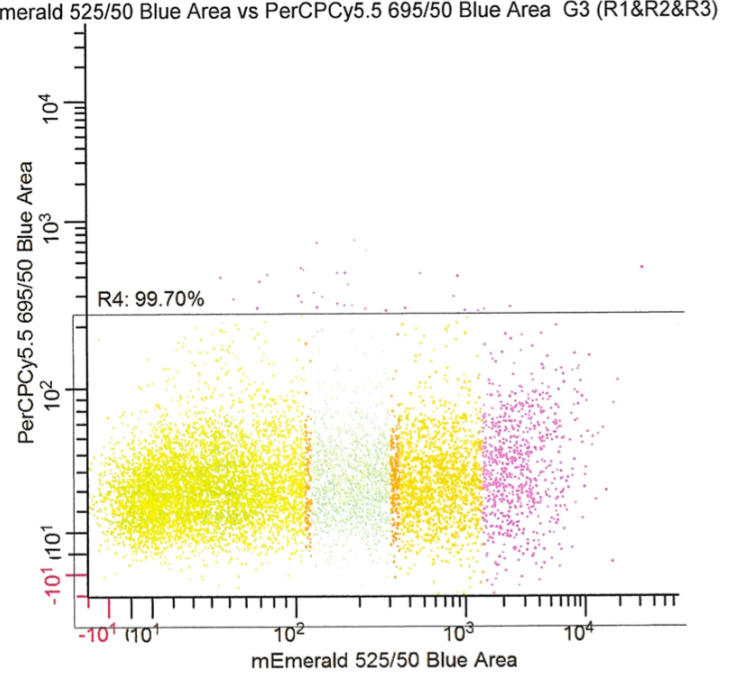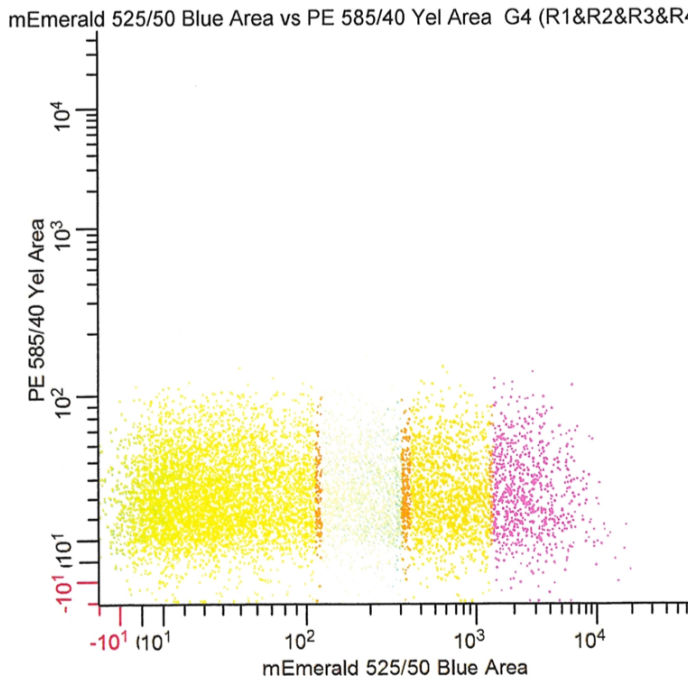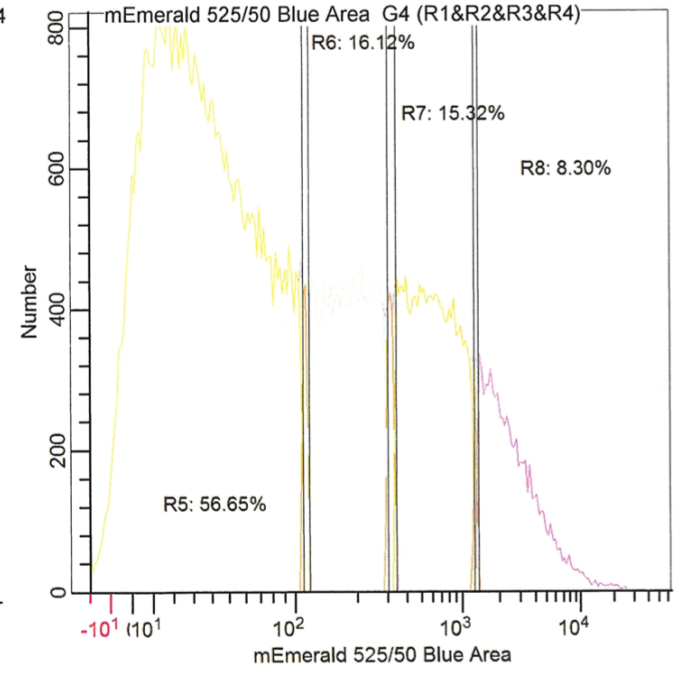



| Id | Percent | %Gate | geoMeanX | MedianX | LowX    | HighX    | geoMeanY |
|----|---------|-------|----------|---------|---------|----------|----------|
| R5 | 25.28   | 56.65 | 34.76    | 32.71   | -29.90  | 108.81   | n/a      |
| R6 | 7.19    | 16.12 | 180.59   | 181.62  | 116.09  | 301.65   | n/a      |
| R7 | 6.83    | 15.32 | 619.20   | 616.98  | 341.70  | 1265.26  | n/a      |
| R8 | 3.70    | 8.30  | 2674.46  | 2399.26 | 1357.29 | 63500.11 | n/a      |
