# Supplementary material for: Mutational scanning of CRX classifies clinical variants and reveals biochemical properties of the transcriptional effector domain
Source: HighWire-hosted journal article supplement (doi:10.1101/gr.279415.124), 2024-09-25
Supplement: Supplemental_Table_S1.xlsx [file Supplemental_Table_S1.xlsx]

## Sheet: Table S1 – Oligos
Supplemental Table S1: Oligo sequences used in this study
Name	Notes	Sequence	Source
pJLS84v2+BC1	N bases indicate variable barcode region	CGGTCCACTCTATAACGCACTAGTCATCGATCGTCACTAGCTGCNNNNNNNNNCANNNNNNNNNAACTCTTACTGCCCAGTCCCTCGAGCCTGCAGGTCTAGTTGGTG	This Study
pJLS84v2+BC2	N bases indicate variable barcode region	AACTCTTACTGCCCAGTCCCNNNNNNNNTGNNNNNNNNCANNNNNNNNTACGCAGATCAGTGATCGTGAGTAGGTGACTGGCCTGCAGGTCTAGTTGGTG	This Study
JClPr88		GCGGTCCACTCTATAACGCAGAGGTACCGTGACGATTAC	This Study
JClPr89		CAGCTAGTGACGATCGATGACACAGAAGTAAGGTTCCTTC	This Study
JLSPr141		GTGACTGGAGTTCAGACGTGTGCTCTTCCGATCTATCCAGAGGTTGATTATCGCG	This Study
JLSPr142		GTGACTGGAGTTCAGACGTGTGCTCTTCCGATCTTATCCAGAGGTTGATTATCGCG	This Study
JLSPr143		GTGACTGGAGTTCAGACGTGTGCTCTTCCGATCTCTATCCAGAGGTTGATTATCGCG	This Study
JLSPr144		GTGACTGGAGTTCAGACGTGTGCTCTTCCGATCTACTATCCAGAGGTTGATTATCGCG	This Study
JLSPr165		CTTTCCCTACACGACGCTCTTCCGATCTCATCGATCGTCACTAGCTGC	This Study
JLSPr166		CTTTCCCTACACGACGCTCTTCCGATCTTCATCGATCGTCACTAGCTGC	This Study
JLSPr167		CTTTCCCTACACGACGCTCTTCCGATCTCTCATCGATCGTCACTAGCTGC	This Study
JLSPr168		CTTTCCCTACACGACGCTCTTCCGATCTACTCATCGATCGTCACTAGCTGC	This Study
JLSPr171		CTTTCCCTACACGACGCTCTTCCGATCGTACTCATCGATCGTCACTAGCTGC	This Study
JLSPr172		CTTTCCCTACACGACGCTCTTCCGATCCGTACTCATCGATCGTCACTAGCTGC	This Study
IDT10_i7_NN	N bases replaced with i7 index	CAAGCAGAAGACGGCATACGAGATNNNNNNNNNNGTGACTGGAGTTCAGACGTG	This Study
IDT10_i5_NN	N bases replaced with i5 index	AATGATACGGCGACCACCGAGATCTACACNNNNNNNNNNACACTCTTTCCCTACACGACGCTC	This Study
