# Supplementary material for: Mutational scanning of CRX classifies clinical variants and reveals biochemical properties of the transcriptional effector domain
Source: HighWire-hosted journal article supplement (doi:10.1101/gr.279415.124), 2024-09-25
Supplement: Supplemental_Table_S2.xlsx [file Supplemental_Table_S2.xlsx]

## Sheet: Table S2 – Plasmids
Supplemental Table S2: Plasmids used in this study
Name	Sequence	Source
pJLS38	ATTGATTATTGACTAGTTATTAATAGTAATCAATTACGGGGTCATTAGTTCATAGCCCATATATGGAGTTCCGCGTTACATAACTTACGGTAAATGGCCCGCCTGGCTGACCGCCCAACGACCCCCGCCCATTGACGTCAATAATGACGTATGTTCCCATAGTAACGCCAATAGGGACTTTCCATTGACGTCAATGGGTGGAGTATTTACGGTAAACTGCCCACTTGGCAGTACATCAAGTGTATCATATGCCAAGTACGCCCCCTATTGACGTCAATGACGGTAAATGGCCCGCCTGGCATTATGCCCAGTACATGACCTTATGGGACTTTCCTACTTGGCAGTACATCTACGTATTAGTCATCGCTATTACCATGGTCGAGGTGAGCCCCACGTTCT…	This Study
pJLS83	CACATTTCCCCGAAAAGTGCCACCTGACGTCTAAGAAACCATTATTATCATGACATTAACCTATAAAAATAGGCGTATCACGAGGCCCTTTCGTCGGGCGAATTGGAGCTCGGAACTCTGGTGGGAGGGGAGGGTCAGTGAAATTGGCTCTGGCGCGGGCGTCCTCCCACCCTCCCCTTCCTTCGGGGGAGTCGGTTTACCCGCCGCCTGCTTGTCTTCGACACCTGATTGGCTGTCGAAGCTGTGGGACCGGGCCCTTGCTACTGGCTCGAGTCTCACATGAGCGAAACCACTGCGCGGGGCGCGGGGGTGGCGGGGAGGCGGGCGTTGGTACGGTCCTCCCCGAGGCCGAGCGCCGCAGTGTCTGGCCCCGCGCCCCTGCGCAACGTGGCAGGAAGC…	This Study
pJLS84v2	TCTAAGAAACGCGATTAAGTTGGGTAACGCCAGGGTTTTCCCAGTCACGACGTTGTAAAACGACGGCCAGTGAATTCTAAGATACATTGATGAGTTTGGACAAACCACAACTAGAATGCAGTGAAAAAAATGCTTTATTTGTGAAATTTGTGATGCTATTGCTTTATTTGTAACCATTATAAGCTGCAATAAACAAGTTACCGGTCTGAGATGCAGGTACATCCCACTGATGAGTCCCAAATAGGACGAAACGCGCTTCGGTGCGTCTGGGATTCCACTGCTATCCACACGCGTGCCCGGATGATCCTGACGACGGAGACCGCCGTCGTCGACAAGCCGGCCGAACAACTTCGTATATACCTTTCTATACGAAGTTGTGCTGGTTTAGTGAGGCGCGCC…	This Study
pJLS96	TGGAAGGGCTAATTCACTCCCAAAGAAGACAAGATATCCTTGATCTGTGGATCTACCACACACAAGGCTACTTCCCTGATTAGCAGAACTACACACCAGGGCCAGGGGTCAGATATCCACTGACCTTTGGATGGTGCTACAAGCTAGTACCAGTTGAGCCAGATAAGGTAGAAGAGGCCAATAAAGGAGAGAACACCAGCTTGTTACACCCTGTGAGCCTGCATGGGATGGATGACCCGGAGAGAGAAGTGTTAGAGTGGAGGTTTGACAGCCGCCTAGCATTTCATCACGTGGCCCGAGAGCTGCATCCGGAGTACTTCAAGAACTGCTGATATCGAGCTTGCTACAAGGGACTTTCCGCTGGGGACTTTCCAGGGAGGCGTGGCCTGGGCGGGACTG…	This Study
pJLS97	TGGAAGGGCTAATTCACTCCCAAAGAAGACAAGATATCCTTGATCTGTGGATCTACCACACACAAGGCTACTTCCCTGATTAGCAGAACTACACACCAGGGCCAGGGGTCAGATATCCACTGACCTTTGGATGGTGCTACAAGCTAGTACCAGTTGAGCCAGATAAGGTAGAAGAGGCCAATAAAGGAGAGAACACCAGCTTGTTACACCCTGTGAGCCTGCATGGGATGGATGACCCGGAGAGAGAAGTGTTAGAGTGGAGGTTTGACAGCCGCCTAGCATTTCATCACGTGGCCCGAGAGCTGCATCCGGAGTACTTCAAGAACTGCTGATATCGAGCTTGCTACAAGGGACTTTCCGCTGGGGACTTTCCAGGGAGGCGTGGCCTGGGCGGGACTG…	This Study
pJLS98	ATTAGGCACCCCAGGCTTTACACTTTATGCTTCCGGCTCGTATAATGTGTGGAATTGTGAGCGGATAACAATTTCACACAGGAAACAGCATCGTGCAGGTCGTTACATAACTTACGGTAAATGGCCCGCCTGGCTGACCGCCCAACGACCCCCGCCCATTGACGTCAATAATGACGTATGTTCCCATAGTAACGCCAATAGGGACTTTCCATTGACGTCAATGGGTGGAGTATTTACGGTAAACTGCCCACTTGGCAGTACATCAAGTGTATCATATGCCAAGTACGCCCCCTATTGACGTCAATGACGGTAAATGGCCCGCCTGGCATTATGCCCAGTACATGACCTTATGGGACTTTCCTACTTGGCAGTACATCTACGTATTAGTCATCGCTATTA…	This Study
pJLS99	TCTAAGAAACGCGATTAAGTTGGGTAACGCCAGGGTTTTCCCAGTCACGACGTTGTAAAACGACGGCCAGTGAATTCTAAGATACATTGATGAGTTTGGACAAACCACAACTAGAATGCAGTGAAAAAAATGCTTTATTTGTGAAATTTGTGATGCTATTGCTTTATTTGTAACCATTATAAGCTGCAATAAACAAGTTACCGGTCTGAGATGCAGGTACATCCCACTGATGAGTCCCAAATAGGACGAAACGCGCTTCGGTGCGTCTGGGATTCCACTGCTATCCACACGCGTGCCCGGATGATCCTGACGACGGAGACCGCCGTCGTCGACAAGCCGGCCGAACAACTTCGTATATACCTTTCTATACGAAGTTGTGCTGGTTTAGTGAGGCGCGCC…	This Study
pJLS100	TCTAAGAAACGCGATTAAGTTGGGTAACGCCAGGGTTTTCCCAGTCACGACGTTGTAAAACGACGGCCAGTGAATTCTAAGATACATTGATGAGTTTGGACAAACCACAACTAGAATGCAGTGAAAAAAATGCTTTATTTGTGAAATTTGTGATGCTATTGCTTTATTTGTAACCATTATAAGCTGCAATAAACAAGTTACCGGTCTGAGATGCAGGTACATCCCACTGATGAGTCCCAAATAGGACGAAACGCGCTTCGGTGCGTCTGGGATTCCACTGCTATCCACACGCGTGCCCGGATGATCCTGACGACGGAGACCGCCGTCGTCGACAAGCCGGCCGAACAACTTCGTATATACCTTTCTATACGAAGTTGTGCTGGTTTAGTGAGGCGCGCC…	This Study
pJLS101	TCTAAGAAACGCGATTAAGTTGGGTAACGCCAGGGTTTTCCCAGTCACGACGTTGTAAAACGACGGCCAGTGAATTCTAAGATACATTGATGAGTTTGGACAAACCACAACTAGAATGCAGTGAAAAAAATGCTTTATTTGTGAAATTTGTGATGCTATTGCTTTATTTGTAACCATTATAAGCTGCAATAAACAAGTTACCGGTCTGAGATGCAGGTACATCCCACTGATGAGTCCCAAATAGGACGAAACGCGCTTCGGTGCGTCTGGGATTCCACTGCTATCCACACGCGTGCCCGGATGATCCTGACGACGGAGACCGCCGTCGTCGACAAGCCGGCCGAACAACTTCGTATATACCTTTCTATACGAAGTTGTGCTGGTTTAGTGAGGCGCGCC…	This Study
pJLS119	TCTAAGAAACGCGATTAAGTTGGGTAACGCCAGGGTTTTCCCAGTCACGACGTTGTAAAACGACGGCCAGTGAATTCTAAGATACATTGATGAGTTTGGACAAACCACAACTAGAATGCAGTGAAAAAAATGCTTTATTTGTGAAATTTGTGATGCTATTGCTTTATTTGTAACCATTATAAGCTGCAATAAACAAGTTACCGGTCTGAGATGCAGGTACATCCCACTGATGAGTCCCAAATAGGACGAAACGCGCTTCGGTGCGTCTGGGATTCCACTGCTATCCACACGCGTGCCCGGATGATCCTGACGACGGAGACCGCCGTCGTCGACAAGCCGGCCGAACAACTTCGTATATACCTTTCTATACGAAGTTGTGCTGGTTTAGTGAGGCGCGCC…	This Study
pJLS120	TCTAAGAAACGCGATTAAGTTGGGTAACGCCAGGGTTTTCCCAGTCACGACGTTGTAAAACGACGGCCAGTGAATTCTAAGATACATTGATGAGTTTGGACAAACCACAACTAGAATGCAGTGAAAAAAATGCTTTATTTGTGAAATTTGTGATGCTATTGCTTTATTTGTAACCATTATAAGCTGCAATAAACAAGTTACCGGTCTGAGATGCAGGTACATCCCACTGATGAGTCCCAAATAGGACGAAACGCGCTTCGGTGCGTCTGGGATTCCACTGCTATCCACACGCGTGCCCGGATGATCCTGACGACGGAGACCGCCGTCGTCGACAAGCCGGCCGAACAACTTCGTATATACCTTTCTATACGAAGTTGTGCTGGTTTAGTGAGGCGCGCC…	This Study
Addgene #11916	CACTATTGCATATGCCATCAAGATTTTGCTGAAAGGACCCTGATAAAGCTGTCTCCTGTGAGGCTTTGCCAGTGCCCAGCAAACACAGAAGTGGATGCTCACAGTCAGCTATTGGATGGAACACAGGGCCCCCAATGGAGGAGCTAGAGAAAGTACCCAAGGAGCTAAAGGGATCTGCAACCCTATAGGTGGAACAGCAATCTGAACTAACCAGTACCCCCTGAACTCGTGTATCTAGCTTCGTATGTAGCAGAAGATGGCCTAGTTGGCCATCACTGGGAAGAGAGGACCCTTGGTCTAGCAAACTATATGCCCCAGTTCAGGGGAAAGCCAGGGCCAAGAAGTGGGAGTGAGTGGGTAGGGGAGCGGGGTGGGGGTAGGGGTGGGGTATAGGGGACT…	PMID: 2288914
Addgene #12260		Trono Lab (Unpublished)
Addgene #12259		Trono Lab (Unpublished)
Addgene #105927		PMID: 29848445
