# Supplementary material for: Mutational scanning of CRX classifies clinical variants and reveals biochemical properties of the transcriptional effector domain
Source: HighWire-hosted journal article supplement (doi:10.1101/gr.279415.124), 2024-09-25
Supplement: Supplemental_Table_S3.xlsx [file Supplemental_Table_S3.xlsx]

## Sheet: Table S3 – Activity Scores
Supplemental Table S3: Per-variant DMS activity scores
var_ref	var_pos	var_alt	normalized_activity_score_mean	normalized_activity_score_std	ks_fdr_pvalue	classification
M	2	A	1.63306	0.253171	9.59e-08	high_activity
M	2	C	1.37805	0.137264	0.00320672	high_activity
M	2	D	1.83248	0.290824	1.14e-10	high_activity
M	2	E	1.4601	0.108482	0.0185083	high_activity
M	2	F	0.802565	0.380187	0.0439836	low_activity
M	2	G	1.07513	0.152257	0.734206	non-significant
M	2	H	1.42969	0.231171	0.00677493	high_activity
M	2	I	0.856453	0.132284	0.146453	non-significant
M	2	K	1.12029	0.120473	0.0931081	non-significant
M	2	L	0.759336	0.214788	0.150712	non-significant
M	2	N	1.4864	0.192784	9.75127e-05	high_activity
M	2	P	1.26378	0.087103	0.230811	non-significant
M	2	Q	1.36817	0.112534	0.00609992	high_activity
M	2	R	1.07955	0.162236	0.733	non-significant
M	2	S	1.23961	0.207959	0.0291178	high_activity
M	2	T	1.9182	0.169275	0.00100652	high_activity
M	2	W	0.734639	0.281695	0.234942	non-significant
M	2	Y	0.887118	0.114115	0.123278	non-significant
A	3	C	0.924559	0.196242	0.242451	non-significant
A	3	D	1.85297	0.157264	5.22e-08	high_activity
A	3	E	1.47988	0.46842	0.000561125	high_activity
A	3	F	0.586702	0.111754	3.1e-06	low_activity
A	3	G	1.39574	0.445166	0.0274107	high_activity
A	3	H	1.13367	0.166277	0.174422	non-significant
A	3	I	0.524751	0.105489	8.13e-07	low_activity
A	3	K	0.959644	0.279248	0.813096	non-significant
A	3	L	0.684173	0.286298	0.0204387	low_activity
A	3	M	0.782038	0.308497	0.0902073	non-significant
A	3	N	1.57476	0.128168	1.3e-06	high_activity
A	3	P	1.49174	0.182044	0.00987266	high_activity
A	3	Q	1.35885	0.303421	0.000103707	high_activity
A	3	R	1.144	0.179018	0.354314	non-significant
A	3	S	1.14361	0.128386	0.0969497	non-significant
A	3	T	1.11045	0.209631	0.882863	non-significant
A	3	V	0.653019	0.243836	4.95673e-05	low_activity
A	3	W	0.630512	0.230999	0.00164883	low_activity
A	3	Y	0.633406	0.176983	2.69217e-05	low_activity
Y	4	A	1.47778	0.281092	0.00187524	high_activity
Y	4	C	1.10859	0.234326	0.509691	non-significant
Y	4	D	1.57807	0.290328	1.11e-07	high_activity
Y	4	E	1.8934	0.123109	1.18e-21	high_activity
Y	4	F	0.946585	0.23072	0.439045	non-significant
Y	4	G	1.443	0.430072	0.00370211	high_activity
Y	4	H	1.29874	0.252676	0.0108124	high_activity
Y	4	I	0.842294	0.239453	0.228705	non-significant
Y	4	K	1.11229	0.421892	0.106242	non-significant
Y	4	L	1.04756	0.134819	0.694226	non-significant
Y	4	M	1.47577	0.444301	0.0759632	non-significant
Y	4	N	1.68433	0.318086	1.02545e-05	high_activity
Y	4	P	1.54012	0.342578	1.6e-07	high_activity
Y	4	Q	1.55345	0.0132336	1.35e-07	high_activity
Y	4	R	1.13791	0.0950185	0.559699	non-significant
Y	4	S	1.51028	0.366079	3.0905e-05	high_activity
Y	4	T	1.24006	0.257078	0.0835435	non-significant
Y	4	V	0.969213	0.110287	0.363272	non-significant
Y	4	W	0.787886	0.0717043	0.0571876	non-significant
M	5	A	1.45593	0.345434	0.0227205	high_activity
M	5	C	1.40243	0.141418	0.00639054	high_activity
M	5	D	1.66758	0.258208	1.65e-06	high_activity
M	5	E	1.54069	0.241046	9.62799e-05	high_activity
M	5	F	0.753144	0.212153	0.00606021	low_activity
M	5	G	1.46217	0.192325	0.0022276	high_activity
M	5	H	1.67482	0.18858	5.72e-09	high_activity
M	5	I	0.71485	0.0910128	0.00491127	low_activity
M	5	K	1.24038	0.170842	0.00633202	high_activity
M	5	L	0.692726	0.111921	0.229504	non-significant
M	5	N	1.16549	0.363416	0.316075	non-significant
M	5	P	1.43631	0.0866421	5.68707e-05	high_activity
M	5	Q	1.43771	0.1593	5.64e-06	high_activity
M	5	R	1.13257	0.097172	0.09243	non-significant
M	5	S	1.44633	0.306952	0.0016371	high_activity
M	5	T	1.27374	0.0645519	0.0067254	high_activity
M	5	V	1.01627	0.309102	0.674151	non-significant
M	5	W	0.850168	0.226781	0.389164	non-significant
M	5	Y	0.884296	0.134153	0.322641	non-significant
N	6	A	0.796639	0.209901	0.169984	non-significant
N	6	C	0.621006	0.164824	0.0215886	low_activity
N	6	D	1.01941	0.309228	0.677974	non-significant
N	6	E	1.28371	0.138464	0.0826852	non-significant
N	6	G	0.904561	0.177035	0.0922011	non-significant
N	6	H	0.758075	0.231439	0.100946	non-significant
N	6	I	0.743034	0.177273	0.048075	low_activity
N	6	K	0.950226	0.247752	0.165488	non-significant
N	6	L	0.521112	0.109825	8.26e-07	low_activity
N	6	M	0.662151	0.217055	0.00136357	low_activity
N	6	P	0.907777	0.0974429	0.170977	non-significant
N	6	Q	0.889779	0.197498	0.63789	non-significant
N	6	R	0.740831	0.254635	0.0749389	non-significant
N	6	S	0.875912	0.119847	0.317098	non-significant
N	6	T	0.910528	0.163416	0.358075	non-significant
N	6	V	0.643796	0.104271	0.0140279	low_activity
N	6	W	0.568603	0.192163	0.000296324	low_activity
N	6	Y	0.806101	0.173581	0.12486	non-significant
P	7	A	1.16727	0.290918	0.547145	non-significant
P	7	C	0.67004	0.224516	0.000206679	low_activity
P	7	D	1.40896	0.107308	3.57e-06	high_activity
P	7	E	1.50825	0.157181	0.000226181	high_activity
P	7	F	0.606443	0.165204	0.000119878	low_activity
P	7	G	1.05523	0.236358	0.967833	non-significant
P	7	H	0.861958	0.169911	0.289313	non-significant
P	7	I	0.87698	0.461558	0.518634	non-significant
P	7	K	0.98053	0.205547	0.964517	non-significant
P	7	L	0.590732	0.0507952	0.000130044	low_activity
P	7	M	0.782845	0.10719	0.02262	low_activity
P	7	N	1.3722	0.175706	0.000389654	high_activity
P	7	Q	1.32702	0.208488	0.000177966	high_activity
P	7	R	1.03153	0.144867	0.370407	non-significant
P	7	S	1.09088	0.19117	0.792992	non-significant
P	7	T	0.706804	0.118297	0.12338	non-significant
P	7	V	0.685535	0.288541	0.0916807	non-significant
P	7	W	0.635492	0.109934	0.000821545	low_activity
P	7	Y	0.678606	0.24336	0.0208856	low_activity
G	8	A	1.00048	0.290674	0.932304	non-significant
G	8	C	0.744154	0.114731	0.0994354	non-significant
G	8	D	1.40748	0.0863387	0.000555518	high_activity
G	8	E	1.48349	0.179979	0.000241244	high_activity
G	8	F	0.691298	0.0186921	0.00240877	low_activity
G	8	H	1.00787	0.111798	0.912886	non-significant
G	8	I	0.73459	0.137443	0.0433146	low_activity
G	8	K	1.14949	0.308085	0.216165	non-significant
G	8	L	0.792891	0.1787	0.100272	non-significant
G	8	M	0.826455	0.184134	0.239429	non-significant
G	8	N	1.20446	0.230562	0.260235	non-significant
G	8	P	1.14785	0.326461	0.184403	non-significant
G	8	Q	1.16657	0.180085	0.254828	non-significant
G	8	R	0.993586	0.164441	0.51525	non-significant
G	8	S	0.867195	0.0947781	0.542995	non-significant
G	8	T	1.10826	0.211937	0.284352	non-significant
G	8	V	0.860727	0.187296	0.0479766	low_activity
G	8	W	0.875987	0.308544	0.0863947	non-significant
G	8	Y	0.63297	0.200883	0.00938182	low_activity
P	9	A	1.19656	0.464226	0.523281	non-significant
P	9	C	0.915267	0.304758	0.523696	non-significant
P	9	D	1.62738	0.441252	1.42946e-05	high_activity
P	9	E	1.17227	0.0643277	0.112208	non-significant
P	9	F	0.859202	0.11326	0.242814	non-significant
P	9	G	0.958859	0.20829	0.538887	non-significant
P	9	H	0.965805	0.138041	0.801885	non-significant
P	9	I	0.614044	0.121493	0.00494235	low_activity
P	9	K	0.866094	0.0782357	0.349721	non-significant
P	9	L	0.78719	0.145619	0.0429681	low_activity
P	9	M	0.957724	0.331278	0.63144	non-significant
P	9	N	1.57715	0.595866	0.0278873	high_activity
P	9	Q	1.08473	0.233866	0.691215	non-significant
P	9	R	0.737616	0.240398	0.0133459	low_activity
P	9	S	1.14948	0.282225	0.778709	non-significant
P	9	T	0.922361	0.155108	0.61614	non-significant
P	9	V	0.844345	0.228838	0.335034	non-significant
P	9	W	0.600165	0.0314972	7.51e-06	low_activity
H	10	A	1.03248	0.0702355	0.533281	non-significant
H	10	C	0.807556	0.163477	0.0443722	low_activity
H	10	D	1.42767	0.352804	0.00396049	high_activity
H	10	E	1.47109	0.129839	1.55721e-05	high_activity
H	10	F	0.778108	0.304652	0.00363997	low_activity
H	10	G	1.26753	0.619838	0.01388	high_activity
H	10	I	0.630397	0.15134	0.000416784	low_activity
H	10	K	1.0474	0.162054	0.365687	non-significant
H	10	L	0.579118	0.0932465	0.000342449	low_activity
H	10	M	0.842455	0.225214	0.297477	non-significant
H	10	N	1.48492	0.0690895	2.69303e-05	high_activity
H	10	P	0.983319	0.218144	0.689002	non-significant
H	10	Q	1.05351	0.281425	0.574572	non-significant
H	10	R	0.911787	0.060265	0.6956	non-significant
H	10	S	1.02518	0.251251	0.904177	non-significant
H	10	V	0.553145	0.156844	0.000177966	low_activity
H	10	W	0.561233	0.154286	0.00020625	low_activity
H	10	Y	0.830437	0.100907	0.18769	non-significant
Y	11	A	1.14913	0.246367	0.266121	non-significant
Y	11	C	1.39122	0.331168	0.000934403	high_activity
Y	11	D	1.56539	0.140558	7.44e-08	high_activity
Y	11	E	1.46562	0.396488	0.00146485	high_activity
Y	11	F	0.668411	0.233766	0.00824157	low_activity
Y	11	G	1.40999	0.206737	0.0030255	high_activity
Y	11	H	1.51876	0.206074	2.91e-07	high_activity
Y	11	I	0.92017	0.112339	0.31604	non-significant
Y	11	K	1.23447	0.142085	0.0654266	non-significant
Y	11	L	0.996772	0.100124	0.784022	non-significant
Y	11	M	1.11287	0.158262	0.442976	non-significant
Y	11	N	1.37284	0.12534	0.00145096	high_activity
Y	11	P	1.28155	0.279068	0.00896146	high_activity
Y	11	Q	1.46511	0.106719	1.22452e-05	high_activity
Y	11	R	1.11464	0.194022	0.242189	non-significant
Y	11	S	1.6024	0.162613	8.93e-09	high_activity
Y	11	T	1.34684	0.241338	0.0368103	high_activity
Y	11	V	1.11189	0.195327	0.233483	non-significant
Y	11	W	0.76577	0.256257	0.0124435	low_activity
S	12	A	0.866942	0.198698	0.321922	non-significant
S	12	C	0.644329	0.343824	0.00360375	low_activity
S	12	D	1.40391	0.140577	0.000108556	high_activity
S	12	E	0.983791	0.3132	0.945609	non-significant
S	12	F	0.731611	0.226398	0.0600542	non-significant
S	12	G	1.07339	0.191534	0.825501	non-significant
S	12	H	0.998629	0.0616827	0.936979	non-significant
S	12	I	0.640828	0.129341	0.000163801	low_activity
S	12	K	0.968318	0.131225	0.806521	non-significant
S	12	L	0.527475	0.0995957	1.19241e-05	low_activity
S	12	M	0.686995	0.095601	0.000559585	low_activity
S	12	N	1.17962	0.175214	0.0315848	high_activity
S	12	P	1.08513	0.135584	0.518579	non-significant
S	12	Q	0.852472	0.140441	0.640808	non-significant
S	12	R	0.802536	0.0809007	0.0807589	non-significant
S	12	T	0.598801	0.354446	0.0032315	low_activity
S	12	V	0.700358	0.266442	0.0306108	low_activity
S	12	W	0.700816	0.321781	0.0142001	low_activity
S	12	Y	0.568179	0.159429	0.00310971	low_activity
V	13	A	1.30085	0.14221	0.232873	non-significant
V	13	C	1.357	0.210123	0.0101362	high_activity
V	13	D	1.69911	0.0937913	4.87e-15	high_activity
V	13	E	1.61542	0.264432	3.19e-09	high_activity
V	13	F	0.901611	0.146787	0.693012	non-significant
V	13	G	1.28821	0.136371	0.000651743	high_activity
V	13	H	1.19068	0.235194	0.230136	non-significant
V	13	I	0.86494	0.232949	0.584482	non-significant
V	13	K	1.3032	0.109845	0.00609992	high_activity
V	13	L	0.919842	0.368723	0.629635	non-significant
V	13	M	0.934482	0.0874321	0.928543	non-significant
V	13	N	1.43544	0.326957	3.71e-06	high_activity
V	13	P	1.3898	0.404578	0.0717983	non-significant
V	13	Q	1.52774	0.257606	0.000545341	high_activity
V	13	R	0.927715	0.187287	0.948937	non-significant
V	13	S	1.0174	0.630336	0.792992	non-significant
V	13	T	1.22089	0.13367	0.221983	non-significant
V	13	W	0.771197	0.0895282	0.0507184	non-significant
V	13	Y	1.12685	0.139616	0.207359	non-significant
N	14	A	0.735128	0.202863	0.0039952	low_activity
N	14	C	0.569514	0.165806	0.000120503	low_activity
N	14	D	1.29073	0.137153	0.0231395	high_activity
N	14	E	1.15338	0.216314	0.736635	non-significant
N	14	F	0.643615	0.05293	7.72494e-05	low_activity
N	14	G	1.0369	0.570327	0.950699	non-significant
N	14	H	0.67672	0.116177	0.0041411	low_activity
N	14	I	0.743437	0.25915	0.0175701	low_activity
N	14	K	0.580903	0.197563	0.00111341	low_activity
N	14	L	0.531608	0.0601572	1.47601e-05	low_activity
N	14	M	0.662043	0.130904	0.00121654	low_activity
N	14	P	0.886883	0.12689	0.035475	low_activity
N	14	Q	0.756753	0.0920531	0.000375649	low_activity
N	14	R	0.651845	0.120129	0.0167014	low_activity
N	14	S	0.899709	0.0419765	0.190896	non-significant
N	14	T	0.557095	0.186808	3.01e-08	low_activity
N	14	V	0.595187	0.226783	0.000897408	low_activity
N	14	W	0.526966	0.249096	0.000256303	low_activity
N	14	Y	0.615692	0.189664	0.00112339	low_activity
A	15	C	0.721358	0.120489	0.00532273	low_activity
A	15	D	1.51452	0.0809358	1.01e-07	high_activity
A	15	E	1.54397	0.229903	5.89e-06	high_activity
A	15	F	0.802669	0.269648	0.00558586	low_activity
A	15	G	0.908077	0.128226	0.665139	non-significant
A	15	H	0.880215	0.140277	0.648342	non-significant
A	15	I	0.648037	0.11623	0.000109151	low_activity
A	15	K	1.12987	0.119824	0.313423	non-significant
A	15	L	0.702723	0.427018	0.0110904	low_activity
A	15	M	0.576949	0.176387	9.65e-06	low_activity
A	15	N	1.25684	0.41277	0.153051	non-significant
A	15	P	1.07443	0.362155	0.493041	non-significant
A	15	Q	1.35704	0.130825	0.00285645	high_activity
A	15	R	0.909055	0.172484	0.628695	non-significant
A	15	S	1.06254	0.355357	0.407389	non-significant
A	15	T	0.979418	0.176326	0.84017	non-significant
A	15	V	0.67348	0.152638	0.00552097	low_activity
A	15	W	0.548488	0.11178	0.000285423	low_activity
A	15	Y	0.684545	0.0821984	0.00764853	low_activity
L	16	A	1.4082	0.0929337	0.000428984	high_activity
L	16	C	1.53675	0.106138	8.04e-06	high_activity
L	16	D	1.66853	0.137413	1.47e-07	high_activity
L	16	E	1.48841	0.33967	0.00142677	high_activity
L	16	F	0.832963	0.163359	0.0278377	low_activity
L	16	G	1.35099	0.213415	0.000780812	high_activity
L	16	H	1.21623	0.209511	0.228816	non-significant
L	16	I	0.743712	0.210247	0.0316233	low_activity
L	16	K	1.42154	0.0491104	0.000378731	high_activity
L	16	M	1.07131	0.0415601	0.22461	non-significant
L	16	N	1.55158	0.0886158	2.37e-07	high_activity
L	16	P	1.41631	0.096472	5.25e-06	high_activity
L	16	Q	1.57724	0.070902	1.03e-06	high_activity
L	16	R	1.20996	0.303295	0.263678	non-significant
L	16	S	1.27854	0.126881	0.0724703	non-significant
L	16	T	1.52382	0.0470763	7.71391e-05	high_activity
L	16	V	0.89613	0.260067	0.883241	non-significant
L	16	W	0.877592	0.251544	0.0691066	non-significant
L	16	Y	0.952075	0.0950886	0.763256	non-significant
A	17	C	0.894607	0.124002	0.510779	non-significant
A	17	D	1.70635	0.445708	3.14117e-05	high_activity
A	17	E	1.43859	0.258661	2.61e-07	high_activity
A	17	F	0.718342	0.07024	0.000563229	low_activity
A	17	G	1.4106	0.266883	0.0156056	high_activity
A	17	I	0.616055	0.111896	0.00618613	low_activity
A	17	K	0.996634	0.179207	0.909468	non-significant
A	17	L	0.599882	0.0762744	0.000538397	low_activity
A	17	M	0.525919	0.0429426	1.98958e-05	low_activity
A	17	N	1.3506	0.143326	0.000985995	high_activity
A	17	P	1.24454	0.341594	0.0424516	high_activity
A	17	Q	1.05559	0.159047	0.813886	non-significant
A	17	R	0.6196	0.220037	0.0218468	low_activity
A	17	S	1.06804	0.158702	0.583428	non-significant
A	17	T	0.953304	0.264167	0.726868	non-significant
A	17	V	0.627134	0.119176	0.000124356	low_activity
A	17	W	0.702968	0.206136	0.00687978	low_activity
A	17	Y	0.629445	0.149064	0.000123743	low_activity
L	18	A	1.44396	0.3566	0.00734639	high_activity
L	18	C	1.31252	0.277086	0.210576	non-significant
L	18	D	1.69428	0.271045	1.13e-06	high_activity
L	18	E	1.52752	0.208706	8.10496e-05	high_activity
L	18	F	0.728081	0.142401	0.141522	non-significant
L	18	G	1.51232	0.184493	1.95e-08	high_activity
L	18	H	1.50131	0.466513	0.0136816	high_activity
L	18	I	0.969954	0.310397	0.959599	non-significant
L	18	K	1.40512	0.0667641	3.931e-05	high_activity
L	18	M	1.25426	0.116562	0.211692	non-significant
L	18	N	1.4938	0.184525	0.0105613	high_activity
L	18	P	1.46921	0.188341	0.00178919	high_activity
L	18	Q	1.744	0.131697	4.14e-06	high_activity
L	18	R	1.31456	0.262693	0.0325828	high_activity
L	18	S	1.29602	0.384123	0.319609	non-significant
L	18	T	1.25965	0.21043	0.0704057	non-significant
L	18	V	1.13308	0.115301	0.310521	non-significant
L	18	W	0.944194	0.0419873	0.461887	non-significant
L	18	Y	0.968078	0.10982	0.954327	non-significant
S	19	A	0.93165	0.167853	0.480708	non-significant
S	19	C	0.61104	0.14926	0.00217256	low_activity
S	19	D	1.1651	0.188401	0.262551	non-significant
S	19	E	1.28917	0.405184	0.153562	non-significant
S	19	F	0.423105	0.0625557	2.21e-06	low_activity
S	19	G	1.02402	0.143914	0.310143	non-significant
S	19	H	1.0337	0.101643	0.996308	non-significant
S	19	I	0.49239	0.165937	2.35614e-05	low_activity
S	19	K	0.786835	0.227167	0.449107	non-significant
S	19	L	0.767825	0.287145	0.268259	non-significant
S	19	N	1.07742	0.0627314	0.917417	non-significant
S	19	P	1.04874	0.164538	0.666934	non-significant
S	19	Q	1.08422	0.248149	0.793091	non-significant
S	19	R	0.762	0.259628	0.0663053	non-significant
S	19	T	0.976146	0.144549	0.96313	non-significant
S	19	Y	0.71249	0.259195	0.0101362	low_activity
G	20	A	0.906976	0.0919277	0.331039	non-significant
G	20	C	0.734601	0.0713954	0.0831446	non-significant
G	20	D	1.07735	0.163859	0.187261	non-significant
G	20	E	1.35768	0.228268	0.00280379	high_activity
G	20	F	0.730592	0.0522219	0.00269796	low_activity
G	20	H	0.906287	0.133623	0.178011	non-significant
G	20	I	0.770699	0.243249	0.175108	non-significant
G	20	K	0.777315	0.0699867	0.0198657	low_activity
G	20	L	0.659269	0.139904	0.00179263	low_activity
G	20	M	0.806939	0.134118	0.152072	non-significant
G	20	N	0.988556	0.141855	0.800776	non-significant
G	20	P	1.02461	0.201092	0.0627572	non-significant
G	20	Q	0.938171	0.346511	0.64245	non-significant
G	20	R	0.83034	0.24563	0.164418	non-significant
G	20	S	1.13623	0.344997	0.210442	non-significant
G	20	T	0.731265	0.209735	0.0896866	non-significant
G	20	V	0.744326	0.203084	0.0110099	low_activity
G	20	W	0.556439	0.204849	0.000546724	low_activity
G	20	Y	0.739593	0.163279	0.0519978	non-significant
P	21	A	1.00925	0.376132	0.897678	non-significant
P	21	C	0.842475	0.156436	0.500211	non-significant
P	21	D	1.1977	0.118128	0.0121554	high_activity
P	21	E	1.33218	0.117809	0.00908596	high_activity
P	21	G	0.962839	0.0852745	0.950699	non-significant
P	21	H	0.75979	0.167036	0.0421553	low_activity
P	21	I	0.65855	0.154277	0.0018316	low_activity
P	21	K	0.952889	0.0957566	0.741089	non-significant
P	21	L	0.711423	0.195669	0.0890488	non-significant
P	21	M	0.663621	0.174421	0.0155485	low_activity
P	21	N	1.03985	0.163156	0.250104	non-significant
P	21	Q	1.15667	0.213213	0.316134	non-significant
P	21	R	0.961883	0.12075	0.500736	non-significant
P	21	S	1.02746	0.124424	0.617092	non-significant
P	21	T	0.836582	0.131913	0.116971	non-significant
P	21	V	0.694316	0.142158	0.000907746	low_activity
P	21	W	0.675009	0.0295003	0.0176408	low_activity
P	21	Y	0.802647	0.244051	0.0374488	low_activity
S	22	A	1.00976	0.241284	0.65563	non-significant
S	22	C	0.937117	0.124001	0.777736	non-significant
S	22	D	1.17032	0.16765	0.29973	non-significant
S	22	E	1.60266	0.782663	0.0712351	non-significant
S	22	F	0.621372	0.179577	0.000456732	low_activity
S	22	G	0.956725	0.126757	0.532738	non-significant
S	22	H	0.746763	0.0538868	0.203273	non-significant
S	22	I	0.587211	0.163095	4.42993e-05	low_activity
S	22	K	0.905257	0.156952	0.485305	non-significant
S	22	M	0.860933	0.0473013	0.155019	non-significant
S	22	N	1.09619	0.226656	0.873671	non-significant
S	22	P	0.865501	0.142597	0.235904	non-significant
S	22	Q	0.805501	0.143821	0.304821	non-significant
S	22	R	0.892037	0.105738	0.128374	non-significant
S	22	T	1.03311	0.0793335	0.343238	non-significant
S	22	V	0.818074	0.286848	0.0438464	low_activity
S	22	W	0.486547	0.199976	5.7e-07	low_activity
S	22	Y	0.61829	0.174493	0.00317772	low_activity
V	23	A	1.21967	0.218616	0.272004	non-significant
V	23	C	1.1424	0.337522	0.450237	non-significant
V	23	D	1.29152	0.16461	0.00225912	high_activity
V	23	E	1.2419	0.100505	0.0388751	high_activity
V	23	G	1.13515	0.212394	0.599013	non-significant
V	23	H	1.06817	0.220539	0.525478	non-significant
V	23	I	0.683964	0.116828	0.0283134	low_activity
V	23	K	1.04713	0.217627	0.26193	non-significant
V	23	L	0.998242	0.138056	0.829416	non-significant
V	23	M	0.960552	0.0996995	0.871961	non-significant
V	23	N	1.21657	0.400174	0.182665	non-significant
V	23	P	1.14918	0.114875	0.304596	non-significant
V	23	Q	1.28938	0.194767	9.54049e-05	high_activity
V	23	R	0.823487	0.206184	0.289645	non-significant
V	23	S	1.09759	0.174935	0.300651	non-significant
V	23	T	1.19754	0.120533	0.268677	non-significant
V	23	W	0.891851	0.118056	0.386465	non-significant
V	23	Y	0.816655	0.0793816	0.186939	non-significant
D	24	A	0.53526	0.255215	0.000151779	low_activity
D	24	C	0.49662	0.0849456	3.3e-06	low_activity
D	24	E	0.809972	0.113166	0.157858	non-significant
D	24	F	0.615666	0.180261	1.28113e-05	low_activity
D	24	G	0.766228	0.173055	0.149005	non-significant
D	24	H	0.616235	0.238926	2.64e-06	low_activity
D	24	I	0.662002	0.191467	0.00017634	low_activity
D	24	K	0.612532	0.182577	3.66985e-05	low_activity
D	24	L	0.605543	0.0911116	2.06141e-05	low_activity
D	24	M	0.713772	0.124879	0.00779267	low_activity
D	24	N	0.942567	0.0962126	0.493432	non-significant
D	24	P	0.383672	0.168572	0.000220246	low_activity
D	24	Q	0.556223	0.224835	0.0114667	low_activity
D	24	R	0.690095	0.210271	0.0176408	low_activity
D	24	S	0.897932	0.279696	0.252388	non-significant
D	24	T	0.692856	0.163541	0.000455842	low_activity
D	24	V	0.698637	0.184622	0.0772187	non-significant
D	24	Y	0.691152	0.212285	0.0182729	low_activity
L	25	A	1.27357	0.136448	0.0465508	high_activity
L	25	C	1.31323	0.198937	0.00226113	high_activity
L	25	D	1.28893	0.242286	0.0509129	non-significant
L	25	E	1.28033	0.305257	0.0215376	high_activity
L	25	F	0.966595	0.21503	0.837482	non-significant
L	25	G	1.41621	0.0663718	0.0275817	high_activity
L	25	H	1.17638	0.162986	0.0556125	non-significant
L	25	I	0.984406	0.100762	0.813537	non-significant
L	25	K	1.04179	0.162008	0.458815	non-significant
L	25	M	1.24659	0.171245	0.0303898	high_activity
L	25	N	1.143	0.180493	0.0598908	non-significant
L	25	Q	1.23628	0.18895	0.0298741	high_activity
L	25	R	1.03793	0.124934	0.824008	non-significant
L	25	S	1.26377	0.107033	0.111704	non-significant
L	25	T	1.33106	0.136367	0.00700354	high_activity
L	25	V	1.00864	0.205642	0.862553	non-significant
L	25	W	0.806604	0.0699415	0.115838	non-significant
L	25	Y	1.07633	0.111021	0.870419	non-significant
M	26	A	1.05766	0.210307	0.569932	non-significant
M	26	C	0.989594	0.119947	0.389598	non-significant
M	26	D	1.24799	0.135682	0.0184518	high_activity
M	26	E	1.35377	0.211863	0.000159089	high_activity
M	26	F	0.774171	0.317508	0.266121	non-significant
M	26	G	0.994338	0.401648	0.892193	non-significant
M	26	H	1.09363	0.108884	0.55663	non-significant
M	26	I	0.762594	0.111005	0.0272101	low_activity
M	26	K	1.06718	0.260827	0.35421	non-significant
M	26	L	0.897177	0.232797	0.523083	non-significant
M	26	N	1.28945	0.272938	0.0967338	non-significant
M	26	P	1.03696	0.206686	0.260916	non-significant
M	26	Q	1.2618	0.16907	0.00847163	high_activity
M	26	R	0.967081	0.184903	0.422436	non-significant
M	26	S	1.10325	0.209036	0.502974	non-significant
M	26	T	0.924648	0.104602	0.635109	non-significant
M	26	V	0.910164	0.220357	0.717538	non-significant
M	26	W	0.713115	0.211108	0.0278913	low_activity
M	26	Y	0.734432	0.264285	0.0358472	low_activity
H	27	A	1.04717	0.0994854	0.784022	non-significant
H	27	C	0.699151	0.433993	0.0213684	low_activity
H	27	D	1.07746	0.346388	0.834275	non-significant
H	27	E	1.14602	0.32479	0.0944105	non-significant
H	27	F	0.51405	0.115699	0.000873448	low_activity
H	27	G	0.921464	0.104856	0.367008	non-significant
H	27	I	0.695257	0.124174	0.118745	non-significant
H	27	K	0.9502	0.187453	0.901041	non-significant
H	27	L	0.613171	0.202988	0.000464897	low_activity
H	27	M	0.61649	0.12479	0.000862184	low_activity
H	27	N	1.07208	0.416251	0.738406	non-significant
H	27	P	1.2035	0.271694	0.0968597	non-significant
H	27	Q	1.18092	0.12603	0.183196	non-significant
H	27	R	0.864036	0.380409	0.0745263	non-significant
H	27	S	1.07424	0.229608	0.831958	non-significant
H	27	T	0.981228	0.250865	0.976235	non-significant
H	27	V	0.575621	0.215394	0.0163675	low_activity
H	27	W	0.602307	0.0820359	1.27975e-05	low_activity
H	27	Y	0.668419	0.290915	0.01251	low_activity
Q	28	A	0.812024	0.195287	0.202042	non-significant
Q	28	C	0.86511	0.139938	0.0888237	non-significant
Q	28	D	1.05459	0.06239	0.269351	non-significant
Q	28	E	1.03705	0.172118	0.917076	non-significant
Q	28	F	0.581774	0.344216	0.104647	non-significant
Q	28	G	0.899028	0.211888	0.670061	non-significant
Q	28	H	0.676474	0.349204	0.0382309	low_activity
Q	28	I	0.610895	0.164198	0.0064615	low_activity
Q	28	K	0.765511	0.136642	0.0683423	non-significant
Q	28	L	0.562729	0.0504978	2.84173e-05	low_activity
Q	28	M	0.619203	0.14208	0.00873053	low_activity
Q	28	N	1.11178	0.224305	0.370502	non-significant
Q	28	P	0.987928	0.280872	0.465938	non-significant
Q	28	R	0.681006	0.127325	0.0329517	low_activity
Q	28	S	1.01323	0.166013	0.548624	non-significant
Q	28	T	1.11107	0.375328	0.923561	non-significant
Q	28	V	0.711282	0.111071	0.0199508	low_activity
Q	28	Y	0.780678	0.0990164	0.00138924	low_activity
A	29	C	0.844943	0.18265	0.235628	non-significant
A	29	D	1.21158	0.1343	0.148071	non-significant
A	29	E	1.23459	0.500927	0.629635	non-significant
A	29	F	0.792611	0.0760831	0.196105	non-significant
A	29	G	0.95512	0.0854104	0.629635	non-significant
A	29	H	0.977131	0.232186	0.877546	non-significant
A	29	I	0.526663	0.100877	0.000485954	low_activity
A	29	K	0.970263	0.147204	0.721856	non-significant
A	29	L	0.616374	0.0560034	0.000313745	low_activity
A	29	M	0.760503	0.310486	0.0716102	non-significant
A	29	N	0.999132	0.220071	0.716741	non-significant
A	29	P	0.932651	0.181814	0.427585	non-significant
A	29	Q	1.13329	0.404931	0.894595	non-significant
A	29	R	0.995551	0.0866865	0.660652	non-significant
A	29	S	0.93768	0.352492	0.975335	non-significant
A	29	T	1.06371	0.103703	0.594371	non-significant
A	29	V	0.712409	0.106947	0.115838	non-significant
A	29	W	0.838918	0.208213	0.0402008	low_activity
A	29	Y	0.920902	0.084717	0.810368	non-significant
V	30	A	1.09216	0.1653	0.0705349	non-significant
V	30	C	1.00927	0.339796	0.976194	non-significant
V	30	D	1.20422	0.29404	0.035898	high_activity
V	30	E	0.956984	0.171229	0.84017	non-significant
V	30	F	0.862031	0.0746483	0.370033	non-significant
V	30	G	1.12881	0.289507	0.275512	non-significant
V	30	H	1.06322	0.224107	0.630865	non-significant
V	30	I	0.886326	0.198184	0.510124	non-significant
V	30	K	1.08699	0.219385	0.283592	non-significant
V	30	L	0.92783	0.162933	0.275714	non-significant
V	30	M	1.14947	0.153388	0.491651	non-significant
V	30	N	0.939271	0.176036	0.961611	non-significant
V	30	P	1.09516	0.111655	0.24733	non-significant
V	30	Q	1.23358	0.0825324	0.102479	non-significant
V	30	R	0.874097	0.17091	0.753422	non-significant
V	30	S	1.17563	0.281232	0.0622728	non-significant
V	30	T	1.17958	0.0341894	0.0465592	high_activity
V	30	W	0.77403	0.0843605	0.016337	low_activity
V	30	Y	0.832248	0.196105	0.040138	low_activity
P	31	A	0.912209	0.158333	0.670061	non-significant
P	31	C	0.908924	0.156614	0.910301	non-significant
P	31	D	0.997488	0.11145	0.9735	non-significant
P	31	E	1.18981	0.107672	0.113813	non-significant
P	31	F	0.587304	0.101373	0.000198602	low_activity
P	31	G	1.01247	0.123027	0.851794	non-significant
P	31	I	0.800074	0.165791	0.0890488	non-significant
P	31	K	1.07718	0.247709	0.85682	non-significant
P	31	L	0.589147	0.166544	0.00801901	low_activity
P	31	M	0.724111	0.178616	0.00062489	low_activity
P	31	N	0.812256	0.0534869	0.0231847	low_activity
P	31	Q	0.892978	0.132354	0.496786	non-significant
P	31	R	0.880664	0.136873	0.518634	non-significant
P	31	S	0.816229	0.0987423	0.315723	non-significant
P	31	T	0.980073	0.101075	0.891391	non-significant
P	31	V	0.640729	0.0695529	0.0182791	low_activity
P	31	W	0.660702	0.228299	0.00708085	low_activity
P	31	Y	0.773866	0.235555	0.125217	non-significant
Y	32	A	1.26656	0.285824	0.0257564	high_activity
Y	32	C	1.03132	0.156401	0.540975	non-significant
Y	32	D	1.11645	0.168956	0.519252	non-significant
Y	32	E	1.34593	0.326428	0.0921936	non-significant
Y	32	F	0.797362	0.173826	0.677624	non-significant
Y	32	G	0.943798	0.174921	0.927444	non-significant
Y	32	H	0.933163	0.211786	0.88178	non-significant
Y	32	I	1.10481	0.349732	0.731203	non-significant
Y	32	K	1.124	0.0713473	0.0198778	high_activity
Y	32	L	0.951068	0.0555862	0.946716	non-significant
Y	32	M	1.05571	0.310101	0.929252	non-significant
Y	32	N	1.2116	0.131845	0.00476541	high_activity
Y	32	P	1.22784	0.194796	0.162675	non-significant
Y	32	Q	1.13946	0.12106	0.158464	non-significant
Y	32	R	0.811017	0.0727745	0.033725	low_activity
Y	32	S	1.25741	0.279512	0.178011	non-significant
Y	32	T	1.19549	0.139115	0.0476701	high_activity
Y	32	V	1.03505	0.0437927	0.734154	non-significant
Y	32	W	0.9267	0.256636	0.721702	non-significant
P	33	A	1.14785	0.230961	0.0388904	high_activity
P	33	C	0.829353	0.165743	0.207903	non-significant
P	33	D	1.08333	0.160006	0.472815	non-significant
P	33	E	1.02755	0.241799	0.470218	non-significant
P	33	F	0.836898	0.0765713	0.215086	non-significant
P	33	G	0.934026	0.105243	0.834275	non-significant
P	33	H	0.911446	0.131414	0.612426	non-significant
P	33	I	0.814531	0.200481	0.270601	non-significant
P	33	K	1.03702	0.158133	0.318074	non-significant
P	33	L	1.04857	0.254711	0.753941	non-significant
P	33	M	0.724273	0.0433623	0.0478789	low_activity
P	33	N	0.878272	0.207309	0.858547	non-significant
P	33	Q	1.13743	0.365538	0.412797	non-significant
P	33	R	0.863673	0.221531	0.121211	non-significant
P	33	S	0.918485	0.13595	0.726732	non-significant
P	33	T	1.06185	0.240127	0.756342	non-significant
P	33	V	0.805051	0.0985078	0.0215886	low_activity
P	33	W	0.747419	0.189445	0.221787	non-significant
P	33	Y	0.572335	0.101951	0.000167429	low_activity
S	34	C	0.98762	0.25167	0.666233	non-significant
S	34	D	1.08905	0.143752	0.445156	non-significant
S	34	E	1.12191	0.174285	0.540063	non-significant
S	34	F	0.84802	0.266305	0.141452	non-significant
S	34	G	0.966224	0.0654711	0.904177	non-significant
S	34	I	0.869016	0.164848	0.219704	non-significant
S	34	K	0.964066	0.156205	0.945866	non-significant
S	34	L	0.877859	0.138855	0.472531	non-significant
S	34	M	0.815529	0.0508303	0.0120266	low_activity
S	34	N	1.00812	0.12377	0.611182	non-significant
S	34	Q	1.06368	0.0851165	0.0813562	non-significant
S	34	R	0.874442	0.0751812	0.389598	non-significant
S	34	V	0.997538	0.0887393	0.472356	non-significant
S	34	W	0.773233	0.0718017	0.00816827	low_activity
S	34	Y	0.833826	0.289146	0.157431	non-significant
A	35	D	0.944685	0.140755	0.876282	non-significant
A	35	E	0.955164	0.238786	0.954631	non-significant
A	35	F	0.847429	0.0981859	0.0581393	non-significant
A	35	G	1.10576	0.255227	0.831573	non-significant
A	35	H	0.947221	0.229892	0.778344	non-significant
A	35	I	0.895772	0.0784589	0.326622	non-significant
A	35	K	0.912203	0.250147	0.44011	non-significant
A	35	L	0.798682	0.135608	0.0740903	non-significant
A	35	M	0.845031	0.15528	0.0863518	non-significant
A	35	N	0.977461	0.309525	0.659369	non-significant
A	35	P	1.04263	0.13203	0.607732	non-significant
A	35	Q	0.980339	0.238532	0.952306	non-significant
A	35	R	0.959076	0.161804	0.835478	non-significant
A	35	S	0.937903	0.127567	0.614591	non-significant
A	35	T	1.12147	0.170166	0.264441	non-significant
A	35	V	1.07851	0.207891	0.65563	non-significant
A	35	W	0.998795	0.271499	0.799956	non-significant
A	35	Y	0.840382	0.0884848	0.0812733	non-significant
P	36	D	0.923625	0.240511	0.874139	non-significant
P	36	E	1.13049	0.115129	0.0518442	non-significant
P	36	G	0.793212	0.30078	0.499605	non-significant
P	36	H	0.861294	0.059842	0.664631	non-significant
P	36	I	0.920524	0.0656356	0.349777	non-significant
P	36	K	0.827911	0.121605	0.412421	non-significant
P	36	L	0.914386	0.0921097	0.321517	non-significant
P	36	M	0.754637	0.167548	0.186703	non-significant
P	36	N	0.920798	0.0769898	0.242733	non-significant
P	36	Q	1.03259	0.0127398	0.677054	non-significant
P	36	R	0.814713	0.1294	0.00429359	low_activity
P	36	S	0.949369	0.168796	0.707901	non-significant
P	36	T	0.947533	0.229136	0.822298	non-significant
P	36	V	1.10811	0.170098	0.539404	non-significant
P	36	W	0.643511	0.249249	0.00345085	low_activity
P	36	Y	0.865278	0.151623	0.312377	non-significant
R	37	A	0.865744	0.370977	0.98207	non-significant
R	37	C	1.05938	0.330901	0.771305	non-significant
R	37	D	0.712658	0.185909	0.0129147	low_activity
R	37	E	1.00099	0.203811	0.663777	non-significant
R	37	F	0.897859	0.237392	0.441137	non-significant
R	37	G	1.1482	0.139933	0.472407	non-significant
R	37	H	0.886991	0.29641	0.359041	non-significant
R	37	I	0.964467	0.283134	0.670494	non-significant
R	37	K	0.936436	0.140095	0.870959	non-significant
R	37	L	1.06926	0.352298	0.749277	non-significant
R	37	M	0.97954	0.263029	0.765746	non-significant
R	37	N	0.908849	0.158703	0.438026	non-significant
R	37	P	0.946713	0.0901577	0.978386	non-significant
R	37	Q	1.04968	0.117734	0.953561	non-significant
R	37	S	1.10571	0.164182	0.141271	non-significant
R	37	V	0.81236	0.181322	0.0853042	non-significant
R	37	W	0.682258	0.186917	0.00244827	low_activity
R	37	Y	0.88553	0.156061	0.416947	non-significant
K	38	A	0.733925	0.166018	0.0128645	low_activity
K	38	C	0.758328	0.109128	0.0119913	low_activity
K	38	D	0.572244	0.142752	0.00174339	low_activity
K	38	E	0.735728	0.0910083	0.00271049	low_activity
K	38	F	0.627379	0.0740061	0.00012127	low_activity
K	38	G	0.762506	0.357538	0.0986625	non-significant
K	38	H	1.01316	0.118769	0.834275	non-significant
K	38	I	0.850917	0.11804	0.177626	non-significant
K	38	L	0.764223	0.175795	0.348765	non-significant
K	38	M	1.04141	0.415652	0.984577	non-significant
K	38	N	1.03652	0.0943949	0.537896	non-significant
K	38	Q	0.496568	0.270091	0.018628	low_activity
K	38	R	0.888501	0.250527	0.468079	non-significant
K	38	T	0.879681	0.105658	0.303563	non-significant
K	38	V	0.771195	0.144403	0.0485125	low_activity
K	38	Y	0.683331	0.162521	0.00722485	low_activity
Q	39	A	0.834975	0.114115	0.0860591	non-significant
Q	39	C	0.90431	0.130286	0.678055	non-significant
Q	39	D	0.8657	0.0798458	0.35408	non-significant
Q	39	E	0.926248	0.0786211	0.503728	non-significant
Q	39	F	0.695683	0.154427	0.0145124	low_activity
Q	39	G	0.940054	0.206234	0.431803	non-significant
Q	39	H	1.00731	0.192531	0.8565	non-significant
Q	39	I	0.803647	0.262987	0.197912	non-significant
Q	39	K	0.758377	0.187908	0.0514758	non-significant
Q	39	L	0.826831	0.206438	0.109659	non-significant
Q	39	M	0.807615	0.201633	0.154986	non-significant
Q	39	N	0.955015	0.213219	0.516699	non-significant
Q	39	R	0.890373	0.0842041	0.538137	non-significant
Q	39	S	1.05162	0.0978987	0.087412	non-significant
Q	39	T	0.888163	0.223643	0.608195	non-significant
Q	39	V	0.851396	0.195278	0.674151	non-significant
Q	39	W	0.573057	0.121188	0.0709318	non-significant
Q	39	Y	0.596051	0.112485	0.0016051	low_activity
R	40	A	0.646591	0.0827756	2.21869e-05	low_activity
R	40	D	0.680892	0.106323	0.042713	low_activity
R	40	E	0.695673	0.127367	7.52595e-05	low_activity
R	40	G	0.673135	0.0469475	5.25e-06	low_activity
R	40	H	0.804275	0.154698	0.00269372	low_activity
R	40	I	0.744627	0.482713	0.0204035	low_activity
R	40	K	1.19118	0.184984	0.0749389	non-significant
R	40	L	0.524696	0.138545	9.75127e-05	low_activity
R	40	M	0.661168	0.203686	8.53e-07	low_activity
R	40	N	0.74484	0.119612	0.0025763	low_activity
R	40	P	0.90586	0.194625	0.161557	non-significant
R	40	Q	0.875285	0.308978	0.0377803	low_activity
R	40	S	0.739573	0.269645	0.336957	non-significant
R	40	T	0.759595	0.240483	0.0973465	non-significant
R	40	V	0.581205	0.210256	6.9e-06	low_activity
R	40	W	0.72162	0.195939	0.000385789	low_activity
R	40	Y	0.599966	0.160922	0.00137311	low_activity
R	41	A	0.589414	0.199257	0.0277834	low_activity
R	41	C	0.680479	0.154183	0.0130523	low_activity
R	41	D	0.694594	0.149602	0.00228666	low_activity
R	41	E	0.668608	0.116471	4.27e-06	low_activity
R	41	F	0.642419	0.15639	0.000143085	low_activity
R	41	G	0.644325	0.132606	0.000190739	low_activity
R	41	H	0.613909	0.0852973	7.27e-07	low_activity
R	41	I	0.616832	0.106624	5.39e-06	low_activity
R	41	K	0.902097	0.126987	0.500801	non-significant
R	41	L	0.762672	0.169876	0.0461172	low_activity
R	41	M	0.764615	0.154905	0.00199482	low_activity
R	41	N	0.674629	0.0721482	0.00064003	low_activity
R	41	P	0.704397	0.159223	0.00690977	low_activity
R	41	Q	0.674067	0.0951999	3.3874e-05	low_activity
R	41	S	0.492579	0.185658	2.05e-06	low_activity
R	41	T	0.682529	0.22698	0.0208641	low_activity
R	41	W	0.629109	0.079219	7.03802e-05	low_activity
R	41	Y	0.565165	0.102774	0.000664927	low_activity
E	42	A	1.05685	0.135147	0.659517	non-significant
E	42	D	1.02131	0.288285	0.677624	non-significant
E	42	F	0.931577	0.109922	0.72236	non-significant
E	42	G	0.97972	0.12514	0.889323	non-significant
E	42	H	1.02268	0.305471	0.873671	non-significant
E	42	K	0.601348	0.313384	0.0184349	low_activity
E	42	L	0.75729	0.116753	0.262035	non-significant
E	42	M	1.01765	0.286426	0.829416	non-significant
E	42	N	1.14882	0.301706	0.519366	non-significant
E	42	P	1.17365	0.56836	0.328301	non-significant
E	42	Q	1.06138	0.307783	0.655792	non-significant
E	42	T	0.668376	0.18314	0.0403292	low_activity
E	42	V	0.951711	0.0946114	0.461762	non-significant
E	42	W	0.846774	0.196138	0.131538	non-significant
E	42	Y	0.925176	0.0955483	0.883241	non-significant
R	43	A	0.629342	0.0852085	5.72161e-05	low_activity
R	43	C	0.689209	0.163515	0.00157787	low_activity
R	43	D	0.756131	0.161041	0.00439993	low_activity
R	43	E	0.60164	0.202265	2.06141e-05	low_activity
R	43	F	0.668415	0.165194	0.00389115	low_activity
R	43	G	0.574878	0.144517	4.34858e-05	low_activity
R	43	H	0.623691	0.0424794	9.34e-06	low_activity
R	43	I	0.649513	0.197234	0.00681009	low_activity
R	43	K	0.762613	0.185644	0.00305237	low_activity
R	43	L	0.59796	0.0860181	3.71559e-05	low_activity
R	43	M	0.611615	0.0809763	0.000399176	low_activity
R	43	N	0.642422	0.153603	0.00342625	low_activity
R	43	P	0.599958	0.208618	0.000554483	low_activity
R	43	Q	0.780073	0.0945964	0.160803	non-significant
R	43	S	0.583881	0.154746	6.01e-07	low_activity
R	43	T	0.599022	0.153079	6.77738e-05	low_activity
R	43	V	0.540593	0.299663	1.36425e-05	low_activity
R	43	W	0.658314	0.108999	0.000581516	low_activity
T	44	A	0.735944	0.118676	0.10291	non-significant
T	44	C	0.654656	0.129621	0.00106002	low_activity
T	44	D	0.712176	0.131881	0.000485291	low_activity
T	44	E	0.653936	0.160944	2.07831e-05	low_activity
T	44	F	0.735245	0.0836889	0.00773535	low_activity
T	44	G	0.766039	0.249898	0.239395	non-significant
T	44	H	0.860622	0.230006	0.298779	non-significant
T	44	I	0.783951	0.0967818	0.0306108	low_activity
T	44	K	0.62086	0.177239	2.09e-06	low_activity
T	44	L	0.61282	0.18036	0.000538711	low_activity
T	44	M	0.544209	0.0722008	7.51e-09	low_activity
T	44	N	0.653258	0.0840493	2.53e-06	low_activity
T	44	P	0.639304	0.212474	0.00463413	low_activity
T	44	Q	0.88237	0.223608	0.629635	non-significant
T	44	R	0.712589	0.124422	0.000164594	low_activity
T	44	S	0.514726	0.0947713	0.000718262	low_activity
T	44	V	0.768353	0.0803187	0.0611347	non-significant
T	44	W	0.677497	0.12027	0.00113919	low_activity
T	44	Y	0.639102	0.137008	4.17e-06	low_activity
T	45	A	1.05342	0.112766	0.272172	non-significant
T	45	D	0.618531	0.200501	0.00291116	low_activity
T	45	E	0.756786	0.232499	0.00580408	low_activity
T	45	F	0.998502	0.122094	0.659015	non-significant
T	45	G	0.57414	0.0710875	1.33926e-05	low_activity
T	45	H	0.983556	0.103206	0.778344	non-significant
T	45	I	0.845354	0.0419372	0.199907	non-significant
T	45	K	1.26359	0.128668	0.00157787	high_activity
T	45	L	1.01589	0.186715	0.268677	non-significant
T	45	M	0.835542	0.145874	0.0315894	low_activity
T	45	N	0.872531	0.0933862	0.342986	non-significant
T	45	P	0.726382	0.115826	0.314184	non-significant
T	45	Q	1.01335	0.22557	0.825314	non-significant
T	45	R	0.855537	0.38311	0.365251	non-significant
T	45	S	0.662088	0.206659	0.00058162	low_activity
T	45	V	0.95859	0.455372	0.467182	non-significant
T	45	W	0.580523	0.156686	1.15e-06	low_activity
T	45	Y	0.908629	0.267493	0.27677	non-significant
F	46	C	0.616082	0.0833321	4.6e-06	low_activity
F	46	D	0.617581	0.110795	0.00169358	low_activity
F	46	E	0.55621	0.049969	1.18e-09	low_activity
F	46	G	0.473112	0.034656	0.00119565	low_activity
F	46	H	0.705168	0.126549	0.0611147	non-significant
F	46	I	0.709342	0.181529	0.0161339	low_activity
F	46	K	0.690458	0.125226	0.00168484	low_activity
F	46	L	0.68462	0.116216	2.54e-06	low_activity
F	46	M	0.623707	0.13016	0.00126088	low_activity
F	46	N	0.684557	0.203276	0.00161616	low_activity
F	46	P	0.791516	0.288519	0.170542	non-significant
F	46	Q	0.634522	0.121026	0.000910463	low_activity
F	46	R	0.653115	0.225442	0.000209331	low_activity
F	46	S	0.64938	0.117388	0.00124191	low_activity
F	46	T	0.570931	0.11676	0.00100434	low_activity
F	46	V	0.863268	0.436151	0.0639135	non-significant
F	46	W	0.648858	0.092235	0.00017634	low_activity
F	46	Y	0.807843	0.15213	0.309456	non-significant
T	47	A	0.958826	0.303943	0.720154	non-significant
T	47	C	0.965479	0.105362	0.594552	non-significant
T	47	D	0.604796	0.105074	0.000583927	low_activity
T	47	E	0.62087	0.0655758	8.48e-06	low_activity
T	47	F	0.763496	0.0945359	0.0377642	low_activity
T	47	G	0.910638	0.0913091	0.43691	non-significant
T	47	H	0.877317	0.0839415	0.245168	non-significant
T	47	I	0.788245	0.188695	0.111543	non-significant
T	47	K	0.985409	0.227565	0.789073	non-significant
T	47	L	0.757331	0.181147	0.102589	non-significant
T	47	M	0.700382	0.261375	0.0517911	non-significant
T	47	N	1.33997	0.236725	0.0465508	high_activity
T	47	P	0.532099	0.0871749	3.61e-09	low_activity
T	47	Q	1.16655	0.184404	0.19382	non-significant
T	47	R	1.11722	0.141584	0.38638	non-significant
T	47	S	0.979568	0.144677	0.600223	non-significant
T	47	V	0.803391	0.185114	0.268467	non-significant
T	47	W	0.79318	0.329583	0.195938	non-significant
T	47	Y	0.931875	0.165093	0.379742	non-significant
R	48	A	1.03845	0.234801	0.682183	non-significant
R	48	C	0.979127	0.248955	0.820188	non-significant
R	48	D	0.622861	0.0974752	7.77035e-05	low_activity
R	48	E	0.704079	0.103458	0.057687	non-significant
R	48	F	0.745815	0.0686805	0.021306	low_activity
R	48	G	0.740943	0.251323	0.0314756	low_activity
R	48	H	0.861791	0.170584	0.315058	non-significant
R	48	I	0.887596	0.157609	0.180888	non-significant
R	48	K	0.874114	0.201904	0.393446	non-significant
R	48	L	0.791454	0.0715248	0.0325828	low_activity
R	48	M	1.0065	0.33494	0.874364	non-significant
R	48	N	0.85155	0.103241	0.0645196	non-significant
R	48	P	0.925019	0.192362	0.852358	non-significant
R	48	Q	1.01618	0.1525	0.885721	non-significant
R	48	S	0.979034	0.100489	0.552548	non-significant
R	48	T	0.869515	0.209471	0.022046	low_activity
R	48	V	0.96316	0.0785735	0.634424	non-significant
R	48	W	0.794148	0.116587	0.108577	non-significant
R	48	Y	0.909314	0.280179	0.136241	non-significant
S	49	A	0.86485	0.0510948	0.105424	non-significant
S	49	D	0.891688	0.0835612	0.308203	non-significant
S	49	E	0.816097	0.0848301	0.00498747	low_activity
S	49	F	0.889091	0.0242333	0.532738	non-significant
S	49	G	0.767997	0.121335	0.0456122	low_activity
S	49	H	0.901991	0.30215	0.820188	non-significant
S	49	I	1.11562	0.337379	0.757328	non-significant
S	49	K	0.980783	0.295465	0.750702	non-significant
S	49	L	0.7624	0.203082	0.047102	low_activity
S	49	M	1.15535	0.0458215	0.152072	non-significant
S	49	N	1.01334	0.254906	0.950699	non-significant
S	49	P	0.901846	0.159624	0.597257	non-significant
S	49	Q	0.864298	0.0489494	0.224707	non-significant
S	49	R	0.925303	0.096675	0.660652	non-significant
S	49	T	1.07879	0.276141	0.577791	non-significant
S	49	V	0.878149	0.0956116	0.635123	non-significant
S	49	W	0.803646	0.228237	0.230479	non-significant
S	49	Y	0.886269	0.146444	0.343238	non-significant
Q	50	A	0.838464	0.219459	0.521768	non-significant
Q	50	C	0.531588	0.0970221	7.56e-07	low_activity
Q	50	D	0.639354	0.17173	2.79698e-05	low_activity
Q	50	E	0.709043	0.117759	0.00101988	low_activity
Q	50	F	0.586363	0.129246	0.000431141	low_activity
Q	50	G	0.571908	0.154634	7.09609e-05	low_activity
Q	50	H	0.929043	0.301753	0.101851	non-significant
Q	50	I	0.519544	0.0924541	6.2e-07	low_activity
Q	50	K	0.669827	0.0888928	0.000192004	low_activity
Q	50	L	0.581257	0.119607	5.31e-07	low_activity
Q	50	M	0.968918	0.28351	0.831958	non-significant
Q	50	N	0.79864	0.126824	0.172925	non-significant
Q	50	P	0.763118	0.18264	0.0079066	low_activity
Q	50	R	0.617776	0.278351	0.0151066	low_activity
Q	50	S	1.00702	0.240886	0.497372	non-significant
Q	50	T	0.663961	0.141989	2.83489e-05	low_activity
Q	50	V	0.710942	0.236927	0.013126	low_activity
Q	50	W	0.430553	0.0882451	7.82e-07	low_activity
Q	50	Y	0.741854	0.238009	0.0213684	low_activity
L	51	A	0.619093	0.242106	0.000266948	low_activity
L	51	C	0.705509	0.126755	0.000993655	low_activity
L	51	D	0.638116	0.121702	0.000232383	low_activity
L	51	E	0.581358	0.180602	0.000276984	low_activity
L	51	G	0.827148	0.165782	0.0507507	non-significant
L	51	H	0.655723	0.116815	0.00021194	low_activity
L	51	I	0.852194	0.128065	0.0997869	non-significant
L	51	K	0.911973	0.0975527	0.616416	non-significant
L	51	M	0.820841	0.0852991	0.0645916	non-significant
L	51	N	0.602135	0.207758	0.000171509	low_activity
L	51	P	0.646965	0.126803	0.00163733	low_activity
L	51	Q	0.65211	0.164939	0.00017634	low_activity
L	51	R	0.951815	0.233525	0.526572	non-significant
L	51	S	0.610307	0.0527803	0.000541096	low_activity
L	51	T	0.761153	0.140139	0.00580152	low_activity
L	51	V	0.833445	0.0390157	0.073399	non-significant
L	51	W	0.670144	0.23997	1.41471e-05	low_activity
L	51	Y	0.911005	0.0929518	0.219048	non-significant
E	52	A	1.09403	0.0780299	0.234342	non-significant
E	52	D	1.00434	0.318875	0.817153	non-significant
E	52	F	0.977682	0.347084	0.600921	non-significant
E	52	G	1.39275	0.244688	0.0756263	non-significant
E	52	H	0.821951	0.143184	0.0917154	non-significant
E	52	I	0.910903	0.132397	0.720864	non-significant
E	52	K	0.778211	0.224449	0.0352517	low_activity
E	52	L	0.81597	0.0947044	0.524629	non-significant
E	52	M	0.981194	0.280251	0.965877	non-significant
E	52	N	1.01072	0.116587	0.989994	non-significant
E	52	P	0.591739	0.067909	3.58e-06	low_activity
E	52	Q	1.02282	0.0606307	0.563674	non-significant
E	52	R	0.816759	0.218572	0.00154831	low_activity
E	52	S	1.02323	0.359043	0.8033	non-significant
E	52	T	1.15771	0.18191	0.267879	non-significant
E	52	V	0.969324	0.245024	0.97173	non-significant
E	52	W	0.672824	0.371878	0.40687	non-significant
E	52	Y	0.945256	0.080566	0.306509	non-significant
E	53	A	0.886422	0.294825	0.735888	non-significant
E	53	C	0.989806	0.187639	0.825435	non-significant
E	53	D	1.03776	0.127508	0.948554	non-significant
E	53	F	1.13886	0.540085	0.444855	non-significant
E	53	G	0.715935	0.205792	3.33592e-05	low_activity
E	53	H	1.02586	0.0789726	0.770625	non-significant
E	53	I	1.11867	0.270332	0.767671	non-significant
E	53	K	0.732249	0.215404	0.00999289	low_activity
E	53	L	0.931248	0.179423	0.508838	non-significant
E	53	M	0.810197	0.170583	0.344485	non-significant
E	53	N	1.00322	0.253445	0.604554	non-significant
E	53	Q	0.8251	0.0868144	0.387322	non-significant
E	53	R	0.849455	0.0422491	0.0756393	non-significant
E	53	S	0.859495	0.0822599	0.0106541	low_activity
E	53	T	0.725876	0.309928	0.0499904	low_activity
E	53	V	0.787655	0.296285	0.122386	non-significant
E	53	W	0.815189	0.0641017	0.203273	non-significant
L	54	A	0.690973	0.215014	0.000195376	low_activity
L	54	C	0.516186	0.125364	2.86099e-05	low_activity
L	54	D	0.651388	0.127148	0.000474716	low_activity
L	54	E	0.669386	0.0970198	0.00195676	low_activity
L	54	F	0.765422	0.499139	0.0320636	low_activity
L	54	G	0.545239	0.146654	0.00037055	low_activity
L	54	H	0.735456	0.152662	5.61901e-05	low_activity
L	54	I	0.574615	0.140524	1.04541e-05	low_activity
L	54	K	0.693602	0.165902	0.00511682	low_activity
L	54	M	0.89695	0.520759	0.172383	non-significant
L	54	N	0.594128	0.203237	5.29744e-05	low_activity
L	54	P	0.67495	0.141603	0.0104759	low_activity
L	54	Q	0.526937	0.148446	0.000101325	low_activity
L	54	R	0.683924	0.0837842	8.82e-06	low_activity
L	54	S	0.489131	0.0957509	2.36676e-05	low_activity
L	54	T	0.659102	0.100982	0.000241409	low_activity
L	54	V	0.674352	0.187648	0.0136261	low_activity
L	54	W	0.548276	0.0555218	1.14e-10	low_activity
L	54	Y	0.600684	0.170777	0.000694538	low_activity
E	55	A	0.656393	0.0894445	0.00158943	low_activity
E	55	C	0.867476	0.222736	0.338826	non-significant
E	55	D	0.915558	0.117495	0.579707	non-significant
E	55	F	1.21433	0.407775	0.842191	non-significant
E	55	G	0.88624	0.141508	0.36022	non-significant
E	55	H	0.999959	0.277498	0.975628	non-significant
E	55	I	0.815065	0.073158	0.201975	non-significant
E	55	K	0.837053	0.184322	0.0813562	non-significant
E	55	L	0.902743	0.107598	0.699398	non-significant
E	55	M	1.0432	0.12756	0.992844	non-significant
E	55	N	0.794323	0.310225	0.456855	non-significant
E	55	P	0.581723	0.0899355	7.14e-06	low_activity
E	55	Q	1.05272	0.391086	0.756342	non-significant
E	55	R	0.756691	0.106694	0.00328593	low_activity
E	55	T	0.932788	0.153487	0.267524	non-significant
E	55	V	0.862054	0.310332	0.211628	non-significant
E	55	W	0.862097	0.223213	0.0619784	non-significant
E	55	Y	0.77151	0.130747	0.0292916	low_activity
A	56	C	1.18568	0.10798	0.0509129	non-significant
A	56	D	1.0396	0.108315	0.914528	non-significant
A	56	E	0.923082	0.165537	0.886971	non-significant
A	56	F	0.99013	0.0932704	0.992844	non-significant
A	56	G	0.887944	0.501153	0.509966	non-significant
A	56	I	0.938538	0.103982	0.403054	non-significant
A	56	K	1.05774	0.264907	0.914528	non-significant
A	56	L	1.05877	0.180557	0.387049	non-significant
A	56	M	1.09516	0.384808	0.861503	non-significant
A	56	N	1.02227	0.186366	0.988673	non-significant
A	56	P	0.650847	0.137444	9.71372e-05	low_activity
A	56	Q	1.02249	0.34293	0.750702	non-significant
A	56	R	0.897389	0.247582	0.328812	non-significant
A	56	S	1.11865	0.334856	0.421044	non-significant
A	56	T	1.00711	0.340258	0.632271	non-significant
A	56	V	0.894826	0.123292	0.376092	non-significant
A	56	W	0.825621	0.188857	0.0461631	low_activity
A	56	Y	1.07765	0.2023	0.691317	non-significant
L	57	A	1.01434	0.123501	0.997117	non-significant
L	57	C	0.83235	0.195535	0.487134	non-significant
L	57	D	0.588282	0.104653	2.00724e-05	low_activity
L	57	E	0.881247	0.19828	0.235083	non-significant
L	57	F	0.846513	0.303463	0.65742	non-significant
L	57	G	0.622903	0.0529066	1.68e-07	low_activity
L	57	H	0.74044	0.136258	0.0466402	low_activity
L	57	I	0.885654	0.119049	0.635338	non-significant
L	57	K	0.776385	0.197335	0.00161674	low_activity
L	57	M	0.792443	0.149686	0.0656167	non-significant
L	57	N	0.600343	0.0899505	0.000518117	low_activity
L	57	P	0.613893	0.173965	0.00562367	low_activity
L	57	Q	1.00412	0.156956	0.954342	non-significant
L	57	R	0.726385	0.146924	0.0151218	low_activity
L	57	S	0.692391	0.0629189	0.00128805	low_activity
L	57	T	0.814259	0.144854	0.106455	non-significant
L	57	V	1.1763	0.296619	0.393446	non-significant
L	57	W	0.810007	0.119918	0.0833837	non-significant
L	57	Y	0.659611	0.165837	0.00517648	low_activity
F	58	A	0.727275	0.245134	0.0174096	low_activity
F	58	C	0.687506	0.152804	0.00705783	low_activity
F	58	D	0.569787	0.184635	7.53835e-05	low_activity
F	58	H	0.781393	0.0759454	0.00328539	low_activity
F	58	I	0.54742	0.125282	0.000508699	low_activity
F	58	K	0.56948	0.175274	6.1e-07	low_activity
F	58	L	0.712853	0.0565401	0.000198666	low_activity
F	58	M	0.680942	0.184025	0.111058	non-significant
F	58	N	0.625413	0.0838907	9.9954e-05	low_activity
F	58	P	0.641231	0.101313	6.41078e-05	low_activity
F	58	Q	0.67433	0.199849	0.000802436	low_activity
F	58	R	0.671166	0.281058	0.0101035	low_activity
F	58	S	0.725403	0.177692	0.00699195	low_activity
F	58	T	0.690648	0.122178	0.00226187	low_activity
F	58	V	0.702426	0.0821084	1.24e-06	low_activity
F	58	W	0.980625	0.107514	0.677859	non-significant
F	58	Y	0.81792	0.147214	0.242247	non-significant
A	59	C	1.17557	0.21101	0.0185555	high_activity
A	59	D	1.01887	0.120103	0.880197	non-significant
A	59	E	0.956675	0.295129	0.763577	non-significant
A	59	F	0.914523	0.13085	0.851794	non-significant
A	59	G	1.12297	0.162002	0.124841	non-significant
A	59	H	0.994321	0.237848	0.837413	non-significant
A	59	I	0.893123	0.350135	0.752982	non-significant
A	59	K	0.89637	0.233704	0.323667	non-significant
A	59	L	1.02693	0.324414	0.921289	non-significant
A	59	M	0.871332	0.154806	0.551532	non-significant
A	59	N	0.88436	0.125743	0.563446	non-significant
A	59	P	0.726319	0.095926	0.0578575	non-significant
A	59	Q	1.16342	0.199617	0.146284	non-significant
A	59	R	0.818722	0.157565	0.1673	non-significant
A	59	S	0.847673	0.156882	0.0731839	non-significant
A	59	T	0.997007	0.143032	0.917076	non-significant
A	59	V	1.02045	0.163873	0.789745	non-significant
A	59	W	1.31002	0.201358	0.00757907	high_activity
A	59	Y	1.23928	0.419462	0.282961	non-significant
K	60	C	1.03351	0.265183	0.539112	non-significant
K	60	D	0.839728	0.134001	0.31448	non-significant
K	60	E	1.04483	0.177852	0.500123	non-significant
K	60	F	0.903006	0.198177	0.677054	non-significant
K	60	G	0.82945	0.135665	0.260773	non-significant
K	60	H	1.02689	0.147953	0.338294	non-significant
K	60	I	0.856015	0.165617	0.282518	non-significant
K	60	L	0.73526	0.425623	0.0677734	non-significant
K	60	M	0.87279	0.256809	0.308649	non-significant
K	60	N	0.911423	0.342879	0.573491	non-significant
K	60	P	0.600767	0.202063	1.58e-07	low_activity
K	60	Q	1.01648	0.272709	0.939347	non-significant
K	60	R	1.23657	0.20836	0.0149199	high_activity
K	60	S	0.920488	0.190488	0.805016	non-significant
K	60	T	0.823121	0.190656	0.523123	non-significant
K	60	V	1.13997	0.119809	0.198946	non-significant
K	60	W	0.888737	0.14318	0.193042	non-significant
K	60	Y	1.18198	0.301962	0.158381	non-significant
T	61	A	0.773355	0.194214	0.102328	non-significant
T	61	C	0.92118	0.341668	0.632161	non-significant
T	61	D	1.02974	0.0922311	0.48869	non-significant
T	61	E	1.11361	0.188393	0.493323	non-significant
T	61	F	0.828816	0.115693	0.14573	non-significant
T	61	G	0.918208	0.151901	0.523964	non-significant
T	61	H	0.986701	0.232726	0.742666	non-significant
T	61	I	1.13695	0.155831	0.461887	non-significant
T	61	K	0.645449	0.0714168	4.06569e-05	low_activity
T	61	L	0.818554	0.067943	0.00883702	low_activity
T	61	M	0.864679	0.294328	0.441151	non-significant
T	61	N	1.12835	0.201825	0.670164	non-significant
T	61	Q	1.06404	0.148643	0.585542	non-significant
T	61	R	0.746127	0.0612281	0.00600025	low_activity
T	61	S	0.900452	0.260926	0.157411	non-significant
T	61	V	0.996093	0.078132	0.98207	non-significant
T	61	W	0.899575	0.331127	0.712556	non-significant
T	61	Y	0.85985	0.269098	0.0126423	low_activity
Q	62	A	0.909969	0.0768857	0.460619	non-significant
Q	62	C	1.02155	0.441156	0.975118	non-significant
Q	62	D	0.931601	0.263328	0.563446	non-significant
Q	62	E	1.13091	0.0770489	0.0857867	non-significant
Q	62	F	1.06678	0.250311	0.933892	non-significant
Q	62	G	0.890861	0.207718	0.411385	non-significant
Q	62	H	0.995287	0.192151	0.9795	non-significant
Q	62	I	0.819162	0.169671	0.132972	non-significant
Q	62	K	0.898055	0.164327	0.369757	non-significant
Q	62	M	1.02433	0.14308	0.910325	non-significant
Q	62	N	1.10028	0.241293	0.854788	non-significant
Q	62	P	1.00306	0.117273	0.893279	non-significant
Q	62	R	1.0053	0.430357	0.883241	non-significant
Q	62	S	0.828872	0.0979444	0.254564	non-significant
Q	62	T	0.846636	0.164522	0.0836148	non-significant
Q	62	V	0.871498	0.192131	0.605979	non-significant
Q	62	W	1.00873	0.187232	0.617466	non-significant
Q	62	Y	1.00227	0.0889617	0.401341	non-significant
Y	63	A	0.723744	0.262067	0.0118904	low_activity
Y	63	C	0.596202	0.250388	0.000335941	low_activity
Y	63	D	0.575974	0.180438	0.00677506	low_activity
Y	63	E	0.65408	0.225341	0.00288981	low_activity
Y	63	F	0.744644	0.139552	0.0107073	low_activity
Y	63	G	0.566739	0.0795282	3.84e-09	low_activity
Y	63	H	0.664094	0.102532	0.0383305	low_activity
Y	63	I	0.688715	0.242738	0.117173	non-significant
Y	63	K	0.540227	0.212723	0.00321909	low_activity
Y	63	L	0.671806	0.132446	0.000255145	low_activity
Y	63	N	0.715369	0.184546	0.0428379	low_activity
Y	63	P	0.612852	0.21567	0.001259	low_activity
Y	63	Q	0.599037	0.115816	2.35e-06	low_activity
Y	63	R	0.687919	0.106062	4.18952e-05	low_activity
Y	63	S	0.593917	0.190175	0.000967833	low_activity
Y	63	T	0.667437	0.165377	0.00137311	low_activity
Y	63	V	0.678439	0.137069	1.4595e-05	low_activity
Y	63	W	0.483886	0.109122	7.27176e-05	low_activity
P	64	A	0.686951	0.328314	0.00690977	low_activity
P	64	C	0.62625	0.0701884	0.00159349	low_activity
P	64	D	0.659607	0.192339	0.00115272	low_activity
P	64	E	0.651193	0.0860267	0.000179329	low_activity
P	64	F	0.787108	0.124711	0.13629	non-significant
P	64	G	0.65145	0.214856	0.0013201	low_activity
P	64	H	0.639791	0.218813	0.00154467	low_activity
P	64	I	0.623495	0.0770898	1.6922e-05	low_activity
P	64	K	0.640305	0.0904227	1.94773e-05	low_activity
P	64	L	0.73432	0.167896	0.00429307	low_activity
P	64	M	0.619324	0.199748	0.0012779	low_activity
P	64	N	0.59468	0.0171761	1.64997e-05	low_activity
P	64	Q	0.619865	0.0571573	4.5027e-05	low_activity
P	64	R	0.63079	0.0668893	1.99e-08	low_activity
P	64	S	0.620731	0.0516403	8.5111e-05	low_activity
P	64	T	0.743153	0.11809	0.00221608	low_activity
P	64	V	0.681967	0.12253	5.20053e-05	low_activity
P	64	W	0.624453	0.12126	0.023682	low_activity
P	64	Y	0.60675	0.257112	4.33757e-05	low_activity
D	65	A	0.769345	0.084664	0.000256462	low_activity
D	65	C	1.02042	0.238842	0.438272	non-significant
D	65	E	0.818307	0.151712	0.0839866	non-significant
D	65	F	0.643494	0.124015	0.000203842	low_activity
D	65	G	0.725014	0.132293	0.0203981	low_activity
D	65	H	0.846329	0.190303	0.0550826	non-significant
D	65	I	0.727183	0.280161	0.0149536	low_activity
D	65	K	0.560478	0.171898	7.71391e-05	low_activity
D	65	M	0.657695	0.185985	7.37589e-05	low_activity
D	65	N	0.766074	0.161043	0.0697473	non-significant
D	65	P	0.892452	0.224511	0.639452	non-significant
D	65	Q	0.627592	0.0890756	0.000153367	low_activity
D	65	R	0.6628	0.0964139	0.00347241	low_activity
D	65	S	0.922111	0.286185	0.549652	non-significant
D	65	T	0.912818	0.0690872	0.266768	non-significant
D	65	V	0.554819	0.211988	0.00473186	low_activity
D	65	W	0.605015	0.200868	0.0361312	low_activity
D	65	Y	0.523586	0.157303	0.000330989	low_activity
V	66	A	0.951871	0.189424	0.700667	non-significant
V	66	C	1.04223	0.110455	0.477753	non-significant
V	66	D	0.669513	0.179336	0.000280274	low_activity
V	66	E	0.795746	0.228961	0.264888	non-significant
V	66	F	0.705248	0.188604	0.00328539	low_activity
V	66	G	0.961681	0.327514	0.670164	non-significant
V	66	H	1.0666	0.179482	0.883241	non-significant
V	66	I	1.08185	0.224836	0.726732	non-significant
V	66	K	1.19377	0.211851	0.0708072	non-significant
V	66	L	1.13725	0.247186	0.275791	non-significant
V	66	M	1.07016	0.182988	0.83687	non-significant
V	66	N	1.07764	0.225549	0.72698	non-significant
V	66	P	0.765932	0.0714136	0.00352336	low_activity
V	66	Q	0.748883	0.0633592	0.00800372	low_activity
V	66	R	0.946288	0.162511	0.878248	non-significant
V	66	S	1.01104	0.235483	0.495882	non-significant
V	66	T	0.870727	0.129263	0.548506	non-significant
V	66	W	0.753792	0.169856	0.0855637	non-significant
V	66	Y	1.17233	0.197173	0.264337	non-significant
Y	67	A	1.06103	0.156071	0.503953	non-significant
Y	67	D	0.756686	0.106361	0.024197	low_activity
Y	67	E	1.07518	0.256681	0.0981426	non-significant
Y	67	F	1.0126	0.159477	0.914528	non-significant
Y	67	G	1.112	0.277288	0.140164	non-significant
Y	67	H	1.25942	0.183954	0.0551978	non-significant
Y	67	I	1.02502	0.135732	0.63468	non-significant
Y	67	K	0.789339	0.121989	0.258186	non-significant
Y	67	L	0.942373	0.207857	0.733985	non-significant
Y	67	M	0.886934	0.525095	0.157892	non-significant
Y	67	N	0.982661	0.09664	0.659212	non-significant
Y	67	P	1.07987	0.146033	0.503449	non-significant
Y	67	Q	1.12633	0.099467	0.0599261	non-significant
Y	67	R	0.962834	0.0988942	0.965877	non-significant
Y	67	S	0.91537	0.276889	0.932304	non-significant
Y	67	T	0.850232	0.237381	0.753792	non-significant
Y	67	V	0.944405	0.0595717	0.880197	non-significant
Y	67	W	0.886182	0.168016	0.266528	non-significant
A	68	C	0.811918	0.187263	0.256734	non-significant
A	68	D	0.893947	0.116074	0.62484	non-significant
A	68	E	0.898918	0.196266	0.912368	non-significant
A	68	F	0.89483	0.110981	0.858547	non-significant
A	68	G	0.832087	0.0570734	0.152021	non-significant
A	68	H	0.82297	0.351255	0.205583	non-significant
A	68	I	0.955158	0.153707	0.618521	non-significant
A	68	K	0.832469	0.154279	0.169027	non-significant
A	68	L	1.00994	0.370044	0.729836	non-significant
A	68	M	0.835907	0.202958	0.1981	non-significant
A	68	N	0.929518	0.101556	0.918141	non-significant
A	68	P	0.580221	0.158634	6.01e-06	low_activity
A	68	Q	0.871382	0.29967	0.177505	non-significant
A	68	S	1.45261	0.139474	0.0509377	non-significant
A	68	T	1.16104	0.284227	0.36022	non-significant
A	68	V	1.06655	0.241591	0.787443	non-significant
A	68	W	0.730673	0.32166	0.0504418	non-significant
A	68	Y	0.941993	0.119703	0.0585479	non-significant
R	69	A	0.664225	0.165698	0.00493202	low_activity
R	69	C	0.713727	0.118655	0.00273667	low_activity
R	69	D	0.630873	0.0809702	5.45189e-05	low_activity
R	69	E	0.6197	0.0968927	0.00076337	low_activity
R	69	F	0.761436	0.0659961	0.0721847	non-significant
R	69	G	0.708285	0.259639	0.00595047	low_activity
R	69	H	0.661351	0.235799	0.0881359	non-significant
R	69	K	0.855943	0.238352	0.824757	non-significant
R	69	M	0.728069	0.0550347	0.0132059	low_activity
R	69	N	0.579693	0.0934207	0.00111341	low_activity
R	69	P	0.585823	0.144853	0.00119388	low_activity
R	69	Q	0.603052	0.0790098	8.81e-07	low_activity
R	69	S	0.531307	0.0755293	1.41471e-05	low_activity
R	69	T	0.557435	0.180284	0.0329517	low_activity
R	69	V	0.623733	0.0924081	5.48143e-05	low_activity
R	69	W	0.539311	0.0798225	4.07817e-05	low_activity
R	69	Y	0.738203	0.16018	0.0029317	low_activity
E	70	A	0.715736	0.317982	0.484458	non-significant
E	70	C	0.651614	0.168807	0.00703759	low_activity
E	70	D	1.13473	0.0800428	0.638439	non-significant
E	70	F	0.795705	0.177098	0.0636277	non-significant
E	70	G	0.883847	0.170737	0.19769	non-significant
E	70	H	0.871745	0.0921926	0.40306	non-significant
E	70	I	0.891813	0.242793	0.0109251	low_activity
E	70	K	1.30173	0.443913	0.150073	non-significant
E	70	L	0.854769	0.363635	0.233581	non-significant
E	70	M	0.79829	0.187968	0.150361	non-significant
E	70	N	0.89414	0.27405	0.415447	non-significant
E	70	P	0.651336	0.158827	2.55e-08	low_activity
E	70	Q	1.02848	0.266724	0.674151	non-significant
E	70	R	1.07133	0.0581412	0.203273	non-significant
E	70	S	0.919194	0.0441328	0.677196	non-significant
E	70	T	0.840162	0.278353	0.316467	non-significant
E	70	V	0.757721	0.0981606	0.00397443	low_activity
E	70	W	0.839853	0.0847908	0.116948	non-significant
E	70	Y	0.821717	0.163442	0.0909715	non-significant
E	71	A	0.825278	0.129353	0.0789055	non-significant
E	71	C	0.92257	0.143936	0.164332	non-significant
E	71	D	0.885139	0.0917166	0.266978	non-significant
E	71	F	0.826074	0.128094	0.0477769	low_activity
E	71	G	0.716285	0.0794101	3.33391e-05	low_activity
E	71	H	0.902098	0.123788	0.539615	non-significant
E	71	I	0.730439	0.245135	0.0816922	non-significant
E	71	K	0.822577	0.242082	0.535821	non-significant
E	71	L	0.824091	0.178209	0.033725	low_activity
E	71	M	0.876082	0.104918	0.728661	non-significant
E	71	N	0.941023	0.103191	0.768985	non-significant
E	71	Q	0.78292	0.277163	0.154781	non-significant
E	71	R	0.839722	0.252987	0.0880712	non-significant
E	71	T	0.926392	0.185396	0.923133	non-significant
E	71	V	0.912924	0.242479	0.24733	non-significant
E	71	Y	0.637665	0.155751	0.0324653	low_activity
V	72	A	1.37883	0.404717	0.35939	non-significant
V	72	C	1.14405	0.168424	0.13542	non-significant
V	72	D	0.637157	0.0123633	0.00854786	low_activity
V	72	E	0.785233	0.0860318	0.00741652	low_activity
V	72	F	0.728101	0.0694065	0.00164585	low_activity
V	72	G	0.651691	0.0652888	1.88e-06	low_activity
V	72	H	0.655524	0.347947	4.34828e-05	low_activity
V	72	I	0.853585	0.186175	0.157465	non-significant
V	72	K	0.533985	0.0643649	8.67e-06	low_activity
V	72	L	0.91053	0.251711	0.641758	non-significant
V	72	M	0.885528	0.279263	0.138501	non-significant
V	72	N	0.594653	0.139265	0.000103345	low_activity
V	72	P	0.650594	0.150203	0.00609992	low_activity
V	72	Q	0.609671	0.0755304	2.87e-06	low_activity
V	72	R	0.607404	0.0735561	0.000214315	low_activity
V	72	S	0.589243	0.042806	0.000446936	low_activity
V	72	T	0.815939	0.373099	0.339058	non-significant
V	72	W	0.654568	0.215024	0.000446936	low_activity
V	72	Y	0.5639	0.153197	1.67424e-05	low_activity
A	73	C	0.643476	0.0388724	0.000670959	low_activity
A	73	D	0.584998	0.141038	0.00017634	low_activity
A	73	E	0.718701	0.15674	0.0308869	low_activity
A	73	F	0.574037	0.16539	0.000136911	low_activity
A	73	G	0.856832	0.148047	0.825314	non-significant
A	73	H	0.641428	0.059513	6.47e-07	low_activity
A	73	I	0.573735	0.19658	1.5086e-05	low_activity
A	73	K	0.684171	0.152426	0.00029962	low_activity
A	73	L	0.620332	0.116517	0.00086186	low_activity
A	73	M	0.669174	0.227288	5.22e-07	low_activity
A	73	N	0.661433	0.108179	2.05e-06	low_activity
A	73	P	0.74213	0.153883	0.00117504	low_activity
A	73	Q	0.623959	0.118488	0.000101018	low_activity
A	73	R	0.709438	0.162824	0.000502819	low_activity
A	73	S	0.806558	0.29952	0.150401	non-significant
A	73	V	0.518395	0.0913737	1.12943e-05	low_activity
A	73	W	0.597873	0.146178	4.13e-06	low_activity
A	73	Y	0.449424	0.11956	6.7e-07	low_activity
L	74	A	0.852032	0.147711	0.413576	non-significant
L	74	C	1.03021	0.197641	0.408519	non-significant
L	74	D	0.630987	0.10589	0.00738506	low_activity
L	74	E	0.968834	0.119834	0.809546	non-significant
L	74	F	0.827723	0.403651	0.32968	non-significant
L	74	G	0.944024	0.190882	0.570098	non-significant
L	74	H	0.968582	0.109103	0.880197	non-significant
L	74	I	0.883395	0.18958	0.416947	non-significant
L	74	K	0.996289	0.325992	0.861873	non-significant
L	74	M	1.05959	0.180047	0.925001	non-significant
L	74	N	0.992441	0.0485597	0.323379	non-significant
L	74	P	0.632502	0.128005	0.000801695	low_activity
L	74	Q	1.13794	0.287038	0.837253	non-significant
L	74	R	0.799979	0.226622	0.212063	non-significant
L	74	S	0.814556	0.120221	0.260106	non-significant
L	74	T	0.91879	0.412549	0.980797	non-significant
L	74	V	0.84567	0.125999	0.132858	non-significant
L	74	W	0.897379	0.198161	0.328505	non-significant
L	74	Y	1.04326	0.357431	0.735494	non-significant
K	75	A	0.82531	0.204369	0.234057	non-significant
K	75	C	0.791909	0.0495741	0.0157657	low_activity
K	75	D	0.649691	0.178136	0.00142523	low_activity
K	75	E	0.61522	0.0722972	6.89e-08	low_activity
K	75	F	0.911317	0.243951	0.849043	non-significant
K	75	G	0.725102	0.00547865	0.00927476	low_activity
K	75	H	0.932247	0.248048	0.211628	non-significant
K	75	I	0.747984	0.184055	0.00372274	low_activity
K	75	L	0.942646	0.339138	0.99993	non-significant
K	75	M	0.963718	0.119865	0.882435	non-significant
K	75	N	0.839442	0.26599	0.199102	non-significant
K	75	P	0.640268	0.113128	1.8898e-05	low_activity
K	75	Q	0.792318	0.199269	0.260706	non-significant
K	75	R	0.936387	0.126412	0.442037	non-significant
K	75	S	0.809256	0.114053	0.156704	non-significant
K	75	T	0.748326	0.098691	0.120214	non-significant
K	75	V	0.70895	0.106736	0.00372274	low_activity
K	75	W	0.557268	0.0464572	6.89e-06	low_activity
K	75	Y	0.770181	0.21265	0.0106404	low_activity
I	76	A	0.678244	0.156107	0.00886554	low_activity
I	76	C	1.06971	0.2727	0.835092	non-significant
I	76	D	0.586737	0.0313816	4.54e-08	low_activity
I	76	E	0.637758	0.0634738	5.78e-07	low_activity
I	76	F	0.652938	0.161521	0.000389654	low_activity
I	76	G	0.645104	0.123624	9.93e-06	low_activity
I	76	H	0.781652	0.184711	0.0277647	low_activity
I	76	K	0.488642	0.201079	0.000266948	low_activity
I	76	L	0.799676	0.117388	0.26694	non-significant
I	76	M	0.845596	0.235897	0.151845	non-significant
I	76	N	0.558696	0.220024	0.000894687	low_activity
I	76	P	0.807585	0.260342	0.429719	non-significant
I	76	Q	0.70043	0.13791	0.000702037	low_activity
I	76	R	0.766203	0.200011	0.048075	low_activity
I	76	S	0.490335	0.141921	9.86594e-05	low_activity
I	76	T	0.947696	0.12306	0.667943	non-significant
I	76	V	0.839918	0.221608	0.152545	non-significant
I	76	W	0.596189	0.0573186	3.13e-10	low_activity
I	76	Y	0.950454	0.0698616	0.640808	non-significant
N	77	A	1.00202	0.184497	0.462554	non-significant
N	77	C	1.18559	0.355566	0.321785	non-significant
N	77	D	0.844602	0.172012	0.253563	non-significant
N	77	E	0.78257	0.157991	0.0640179	non-significant
N	77	F	1.0081	0.268676	0.33095	non-significant
N	77	G	1.09003	0.289386	0.950699	non-significant
N	77	I	0.701832	0.156057	0.000106638	low_activity
N	77	K	0.811829	0.0841461	0.0562396	non-significant
N	77	L	0.924713	0.0951815	0.427489	non-significant
N	77	M	0.82997	0.330273	0.582262	non-significant
N	77	P	0.638806	0.151154	0.016722	low_activity
N	77	Q	1.01946	0.095047	0.760533	non-significant
N	77	R	0.971438	0.213297	0.983752	non-significant
N	77	S	0.914195	0.130901	0.658018	non-significant
N	77	T	0.828252	0.409552	0.669736	non-significant
N	77	V	0.667659	0.0963015	0.00261402	low_activity
N	77	W	0.722556	0.0845294	0.00533295	low_activity
N	77	Y	0.992742	0.24676	0.946399	non-significant
L	78	A	0.790957	0.0674277	0.0489385	low_activity
L	78	C	0.648004	0.0459069	6.47e-06	low_activity
L	78	D	0.729313	0.141264	0.000321158	low_activity
L	78	E	0.661152	0.217149	0.000606683	low_activity
L	78	F	0.677019	0.0868441	5.35968e-05	low_activity
L	78	G	0.613837	0.22326	0.000175074	low_activity
L	78	H	1.0262	0.379821	0.997117	non-significant
L	78	I	0.769099	0.116952	0.164332	non-significant
L	78	K	1.29173	0.165225	0.142118	non-significant
L	78	M	0.797973	0.17822	0.105343	non-significant
L	78	N	0.637609	0.174696	0.00193257	low_activity
L	78	P	0.621186	0.184937	0.00642849	low_activity
L	78	Q	1.08388	0.174818	0.522155	non-significant
L	78	R	1.06002	0.118717	0.602658	non-significant
L	78	S	0.700256	0.220913	0.000307507	low_activity
L	78	T	0.644254	0.184042	0.000895128	low_activity
L	78	V	0.808081	0.199025	0.00569372	low_activity
L	78	W	0.690806	0.0798474	5.81721e-05	low_activity
L	78	Y	0.549659	0.0813499	3.35e-07	low_activity
P	79	A	1.02911	0.238831	0.571127	non-significant
P	79	C	0.981324	0.0860107	0.638692	non-significant
P	79	D	1.09852	0.141203	0.155311	non-significant
P	79	E	1.12725	0.0964059	0.0620605	non-significant
P	79	F	0.684666	0.152858	0.0016051	low_activity
P	79	G	0.934086	0.113462	0.336421	non-significant
P	79	H	0.962787	0.142986	0.76021	non-significant
P	79	I	0.517885	0.162152	0.0047167	low_activity
P	79	K	1.13487	0.23423	0.460619	non-significant
P	79	L	0.850284	0.133901	0.178526	non-significant
P	79	M	0.812374	0.272257	0.315367	non-significant
P	79	N	0.97554	0.187939	0.946709	non-significant
P	79	Q	1.22821	0.348231	0.174422	non-significant
P	79	R	0.93967	0.115094	0.382877	non-significant
P	79	S	0.819096	0.280685	0.0921722	non-significant
P	79	T	0.905804	0.135657	0.235497	non-significant
P	79	V	0.925038	0.0602193	0.863081	non-significant
P	79	W	0.661806	0.23516	0.0374488	low_activity
P	79	Y	0.665023	0.12891	6.27624e-05	low_activity
E	80	A	0.880822	0.28276	0.857184	non-significant
E	80	C	0.947625	0.0868942	0.684838	non-significant
E	80	D	0.755158	0.211993	0.0185564	low_activity
E	80	F	0.885819	0.129647	0.124689	non-significant
E	80	G	0.935827	0.126006	0.94134	non-significant
E	80	H	0.830171	0.24738	0.392495	non-significant
E	80	I	0.985429	0.280259	0.58735	non-significant
E	80	K	0.764327	0.120112	0.00287624	low_activity
E	80	L	0.882024	0.303839	0.203273	non-significant
E	80	M	0.91648	0.0994568	0.393446	non-significant
E	80	N	0.995979	0.0826246	0.923336	non-significant
E	80	P	0.978368	0.174439	0.831573	non-significant
E	80	Q	1.16222	0.475341	0.605914	non-significant
E	80	R	0.930776	0.204545	0.682183	non-significant
E	80	S	0.902849	0.180279	0.797231	non-significant
E	80	T	0.907725	0.142503	0.757155	non-significant
E	80	V	0.989031	0.209987	0.870407	non-significant
E	80	W	0.644807	0.0527577	4.49935e-05	low_activity
E	80	Y	0.976131	0.293785	0.847078	non-significant
S	81	C	0.957857	0.148423	0.651782	non-significant
S	81	D	1.2418	0.534513	0.599945	non-significant
S	81	E	1.13343	0.148846	0.344169	non-significant
S	81	F	0.655822	0.103639	9.86e-06	low_activity
S	81	G	1.04513	0.176189	0.422539	non-significant
S	81	H	0.985004	0.131752	0.367118	non-significant
S	81	I	1.01192	0.171456	0.523281	non-significant
S	81	K	1.01838	0.250222	0.490952	non-significant
S	81	L	0.92339	0.341501	0.868691	non-significant
S	81	M	1.07121	0.208726	0.490575	non-significant
S	81	N	1.09615	0.379711	0.834275	non-significant
S	81	P	1.01109	0.397781	0.311271	non-significant
S	81	Q	1.28254	0.0649053	0.0392441	high_activity
S	81	R	0.97888	0.195972	0.798314	non-significant
S	81	T	0.814251	0.191316	0.652914	non-significant
S	81	V	1.24131	0.352809	0.0956657	non-significant
S	81	W	0.79001	0.207433	0.0249928	low_activity
S	81	Y	0.738508	0.143776	0.00135274	low_activity
R	82	A	0.617659	0.0864697	2.54e-06	low_activity
R	82	C	0.895586	0.204907	0.457239	non-significant
R	82	D	0.626684	0.169006	6.89e-08	low_activity
R	82	E	0.610848	0.0952531	2.15893e-05	low_activity
R	82	F	0.548958	0.13019	2.33e-06	low_activity
R	82	G	0.673949	0.0490101	4.22705e-05	low_activity
R	82	H	0.552052	0.0646527	8.5111e-05	low_activity
R	82	I	0.981992	0.0533595	0.929252	non-significant
R	82	K	1.0894	0.22605	0.293643	non-significant
R	82	L	0.626866	0.0621658	6.01e-06	low_activity
R	82	M	0.699001	0.16716	0.00023369	low_activity
R	82	N	0.760699	0.181739	0.0658366	non-significant
R	82	P	0.698699	0.0846846	0.000119647	low_activity
R	82	Q	0.600423	0.119203	1.02545e-05	low_activity
R	82	S	0.649067	0.195389	0.00746704	low_activity
R	82	T	0.732431	0.182895	0.0683423	non-significant
R	82	V	0.898573	0.184358	0.460943	non-significant
R	82	W	0.50749	0.0923734	3.82e-06	low_activity
R	82	Y	0.570984	0.137376	6.89e-08	low_activity
V	83	A	0.766943	0.198976	0.164293	non-significant
V	83	C	0.6386	0.234161	0.0145461	low_activity
V	83	D	0.668845	0.349553	0.0013619	low_activity
V	83	E	0.617296	0.11168	6.92e-06	low_activity
V	83	F	0.575315	0.10811	5.51e-06	low_activity
V	83	G	0.674285	0.094867	7.34893e-05	low_activity
V	83	H	0.584723	0.136607	0.000196704	low_activity
V	83	I	0.974488	0.112996	0.914311	non-significant
V	83	K	0.634327	0.37807	0.00139935	low_activity
V	83	L	0.689221	0.163033	0.00665962	low_activity
V	83	M	0.645313	0.0127536	8.64e-07	low_activity
V	83	N	0.675802	0.165929	0.000684123	low_activity
V	83	P	0.625986	0.11052	0.000278231	low_activity
V	83	Q	0.681727	0.109641	0.00031283	low_activity
V	83	R	0.824482	0.292287	0.0761789	non-significant
V	83	S	0.729624	0.219752	0.0245697	low_activity
V	83	T	0.653912	0.0580766	0.00066791	low_activity
V	83	W	0.662068	0.091541	0.000682744	low_activity
V	83	Y	0.575227	0.0414666	8.26e-07	low_activity
Q	84	A	0.98766	0.227212	0.643707	non-significant
Q	84	C	0.948053	0.178749	0.868151	non-significant
Q	84	D	0.575522	0.275931	2.69217e-05	low_activity
Q	84	E	0.576699	0.167781	4.51543e-05	low_activity
Q	84	F	0.716143	0.0890084	0.00302064	low_activity
Q	84	G	1.25237	0.530369	0.163529	non-significant
Q	84	H	0.881422	0.151811	0.630345	non-significant
Q	84	I	0.876375	0.157101	0.429825	non-significant
Q	84	K	1.01895	0.123053	0.750702	non-significant
Q	84	L	0.792934	0.164673	0.0261554	low_activity
Q	84	M	1.14365	0.11741	0.210978	non-significant
Q	84	N	0.848819	0.109032	0.541285	non-significant
Q	84	P	0.777072	0.262695	0.0241023	low_activity
Q	84	R	0.936231	0.316467	0.983752	non-significant
Q	84	S	0.998003	0.143086	0.416841	non-significant
Q	84	T	0.839492	0.0844793	0.123928	non-significant
Q	84	V	0.926598	0.0884487	0.670061	non-significant
Q	84	W	0.728099	0.0934549	0.00980723	low_activity
Q	84	Y	1.06718	0.120122	0.407231	non-significant
V	85	A	0.668064	0.148566	0.00287946	low_activity
V	85	C	0.697932	0.0643419	0.000171509	low_activity
V	85	D	0.716736	0.189964	0.00111341	low_activity
V	85	E	0.720029	0.105378	0.00232806	low_activity
V	85	F	0.646716	0.119605	0.0104759	low_activity
V	85	G	0.626227	0.100434	0.00265801	low_activity
V	85	H	0.639956	0.13376	0.0275571	low_activity
V	85	I	0.91563	0.0984988	0.735049	non-significant
V	85	K	0.7302	0.214874	0.116775	non-significant
V	85	L	0.568875	0.0814501	1.09443e-05	low_activity
V	85	M	0.577429	0.0298575	0.000208962	low_activity
V	85	N	0.664424	0.0966507	1.9227e-05	low_activity
V	85	P	0.592768	0.186524	0.000154534	low_activity
V	85	Q	0.750467	0.103038	0.0755162	non-significant
V	85	R	0.957893	0.272605	0.474386	non-significant
V	85	S	0.680965	0.16288	0.000895716	low_activity
V	85	T	0.696678	0.184928	0.0958891	non-significant
V	85	W	0.481811	0.0719346	2.64e-09	low_activity
V	85	Y	0.717098	0.137827	0.000753634	low_activity
W	86	C	0.67201	0.263252	0.000109151	low_activity
W	86	D	0.60836	0.13882	0.000559585	low_activity
W	86	E	0.599752	0.225464	1.55721e-05	low_activity
W	86	F	0.642313	0.103514	0.00230592	low_activity
W	86	G	0.72516	0.309751	0.00178463	low_activity
W	86	H	0.623445	0.110578	1.01785e-05	low_activity
W	86	I	0.53005	0.0284184	1.47e-07	low_activity
W	86	K	0.643217	0.19497	0.0025763	low_activity
W	86	L	0.639776	0.174384	5.40565e-05	low_activity
W	86	M	0.703936	0.175382	0.00671665	low_activity
W	86	N	0.610524	0.224228	0.0197594	low_activity
W	86	P	0.547437	0.0407409	1.27975e-05	low_activity
W	86	Q	0.592494	0.211479	0.00112351	low_activity
W	86	R	0.662745	0.127079	0.000232363	low_activity
W	86	S	0.614974	0.116468	6.53e-06	low_activity
W	86	T	0.592916	0.336548	0.000503645	low_activity
W	86	V	0.665882	0.178535	0.000239021	low_activity
W	86	Y	0.71797	0.212791	0.00994464	low_activity
F	87	A	0.631268	0.14851	0.0019045	low_activity
F	87	C	0.700808	0.0603657	0.00132755	low_activity
F	87	D	0.70286	0.179903	0.00165948	low_activity
F	87	E	0.68827	0.174324	0.00041933	low_activity
F	87	G	0.675293	0.109815	0.000279199	low_activity
F	87	H	0.572775	0.168184	2.48e-07	low_activity
F	87	I	0.6104	0.0755181	1.02545e-05	low_activity
F	87	K	0.729317	0.142215	0.00291315	low_activity
F	87	L	0.695376	0.200287	0.000317855	low_activity
F	87	M	1.01643	0.170879	0.953183	non-significant
F	87	N	0.578445	0.145248	8.08112e-05	low_activity
F	87	P	0.585515	0.140751	1.09443e-05	low_activity
F	87	Q	0.739247	0.189617	0.0859218	non-significant
F	87	R	0.560775	0.129554	1.42946e-05	low_activity
F	87	S	0.603125	0.164828	3.51e-06	low_activity
F	87	T	0.640713	0.126747	0.000262352	low_activity
F	87	V	0.683779	0.0668519	0.00285059	low_activity
F	87	W	0.606424	0.0783143	2.01858e-05	low_activity
F	87	Y	0.688098	0.236471	0.0254825	low_activity
K	88	A	0.535613	0.105646	0.000818522	low_activity
K	88	C	0.678651	0.222999	0.0157415	low_activity
K	88	D	0.645976	0.326	0.000604999	low_activity
K	88	E	0.695769	0.134242	0.000176951	low_activity
K	88	F	0.703713	0.175629	2.26123e-05	low_activity
K	88	G	0.677966	0.0670494	0.000374276	low_activity
K	88	H	0.641586	0.105174	5.81721e-05	low_activity
K	88	I	0.705803	0.106875	0.00418903	low_activity
K	88	L	0.565726	0.122517	0.0011455	low_activity
K	88	M	0.558119	0.275961	0.00482868	low_activity
K	88	N	0.650533	0.154155	8.42305e-05	low_activity
K	88	P	0.593758	0.0385114	1.61e-06	low_activity
K	88	Q	0.746689	0.192051	0.00205667	low_activity
K	88	R	0.531127	0.146651	0.00399867	low_activity
K	88	S	0.622028	0.073474	0.00037055	low_activity
K	88	T	0.701456	0.109457	2.69217e-05	low_activity
K	88	V	0.6956	0.173131	0.00308185	low_activity
K	88	W	0.656291	0.116052	0.000331481	low_activity
K	88	Y	0.68874	0.225114	0.000376708	low_activity
N	89	A	0.642851	0.134525	0.0444884	low_activity
N	89	C	0.592257	0.0601377	0.000186007	low_activity
N	89	D	0.564776	0.0612215	0.000389654	low_activity
N	89	E	0.544566	0.0858548	6.1e-08	low_activity
N	89	F	0.754348	0.124173	0.000380064	low_activity
N	89	G	0.608429	0.115446	0.000111807	low_activity
N	89	H	0.552976	0.337681	0.051369	non-significant
N	89	I	0.584434	0.0685204	1.09621e-05	low_activity
N	89	K	0.6146	0.0699982	2.49e-06	low_activity
N	89	L	0.632794	0.0808418	0.00191891	low_activity
N	89	M	0.579225	0.121025	0.000385789	low_activity
N	89	P	0.690812	0.108267	0.00024124	low_activity
N	89	Q	0.658354	0.0569547	1.27487e-05	low_activity
N	89	S	0.562829	0.217689	0.000311149	low_activity
N	89	T	0.92137	0.36161	0.493008	non-significant
N	89	V	0.577483	0.0994495	5.53e-08	low_activity
N	89	W	0.565036	0.167506	4.1e-06	low_activity
N	89	Y	0.683345	0.273533	3.71559e-05	low_activity
R	90	A	0.711207	0.184914	0.00861988	low_activity
R	90	C	0.648265	0.0865487	0.0678815	non-significant
R	90	D	0.600656	0.192168	6.34e-06	low_activity
R	90	E	0.665767	0.0852433	0.00834117	low_activity
R	90	F	0.645228	0.26184	0.0215886	low_activity
R	90	G	0.65414	0.147379	0.00521846	low_activity
R	90	H	0.817465	0.225013	0.187261	non-significant
R	90	I	0.648591	0.185422	1.23184e-05	low_activity
R	90	K	0.962922	0.136799	0.640808	non-significant
R	90	L	0.665105	0.218016	0.0105625	low_activity
R	90	M	0.662875	0.184498	1.25119e-05	low_activity
R	90	N	0.705132	0.0816651	0.0565538	non-significant
R	90	P	0.564928	0.0796989	0.0374488	low_activity
R	90	Q	0.696116	0.164187	0.00315289	low_activity
R	90	T	0.58227	0.203886	0.00682469	low_activity
R	90	V	0.697129	0.138212	0.00117989	low_activity
R	90	W	0.650705	0.148585	0.00288981	low_activity
R	90	Y	0.65186	0.118808	0.00587156	low_activity
R	91	A	0.597926	0.146717	3.26583e-05	low_activity
R	91	C	0.643586	0.121242	2.61951e-05	low_activity
R	91	D	0.606079	0.148853	2.58997e-05	low_activity
R	91	E	0.607982	0.0903679	0.000474716	low_activity
R	91	F	0.623499	0.125836	0.071091	non-significant
R	91	G	0.767269	0.166166	0.00921758	low_activity
R	91	H	0.481557	0.200339	4.41458e-05	low_activity
R	91	I	0.558716	0.121041	0.000538711	low_activity
R	91	K	0.735832	0.151972	0.0644923	non-significant
R	91	L	0.52823	0.0919102	1.67268e-05	low_activity
R	91	M	0.627157	0.141124	0.000168078	low_activity
R	91	N	0.618975	0.176612	0.0071978	low_activity
R	91	Q	0.632597	0.129359	0.000226181	low_activity
R	91	S	0.613983	0.142804	4.11e-07	low_activity
R	91	T	0.654121	0.240164	0.00281903	low_activity
R	91	V	0.658294	0.129045	0.000751494	low_activity
R	91	W	0.609224	0.101492	2.05e-06	low_activity
R	91	Y	0.591628	0.0962308	1.38488e-05	low_activity
A	92	C	0.80366	0.0324085	0.330728	non-significant
A	92	D	0.559922	0.188957	0.00194627	low_activity
A	92	E	0.786872	0.154991	0.00269284	low_activity
A	92	F	0.753543	0.189694	0.0419893	low_activity
A	92	G	0.712608	0.084983	0.000528078	low_activity
A	92	H	0.581723	0.0908019	0.00149839	low_activity
A	92	I	0.433	0.113579	0.000527579	low_activity
A	92	K	0.61524	0.172397	0.000411708	low_activity
A	92	L	0.721626	0.175578	0.095307	non-significant
A	92	M	0.747003	0.238045	0.0476163	low_activity
A	92	N	0.749126	0.310517	0.0105618	low_activity
A	92	P	0.591299	0.116588	8.27e-06	low_activity
A	92	Q	0.9367	0.205313	0.266836	non-significant
A	92	R	0.644048	0.121978	0.00937799	low_activity
A	92	S	0.775441	0.11569	0.0478747	low_activity
A	92	T	0.647778	0.17845	0.000632771	low_activity
A	92	V	0.685693	0.0671146	0.0161119	low_activity
A	92	W	0.802773	0.202423	0.23278	non-significant
A	92	Y	0.869789	0.334804	0.351445	non-significant
K	93	A	0.606775	0.0503914	0.00183881	low_activity
K	93	C	0.499185	0.22936	0.00158842	low_activity
K	93	D	0.533247	0.155511	1.55e-07	low_activity
K	93	E	0.52666	0.186526	5.72e-09	low_activity
K	93	F	0.533495	0.176975	5.88e-08	low_activity
K	93	G	0.645436	0.150534	0.000349282	low_activity
K	93	H	0.539972	0.146623	5.51e-06	low_activity
K	93	I	0.673916	0.161758	0.00241872	low_activity
K	93	L	0.67151	0.0370588	0.000485291	low_activity
K	93	M	0.633753	0.145922	4.54369e-05	low_activity
K	93	N	0.557793	0.0762871	6.65899e-05	low_activity
K	93	P	0.69872	0.320041	0.00407943	low_activity
K	93	Q	0.615823	0.0880013	3.41241e-05	low_activity
K	93	R	0.928627	0.151607	0.880197	non-significant
K	93	S	0.760966	0.207639	0.022047	low_activity
K	93	T	0.626486	0.123941	0.00125024	low_activity
K	93	V	0.641319	0.108487	0.000173775	low_activity
K	93	W	0.724707	0.170173	0.00163914	low_activity
K	93	Y	0.614594	0.155749	1.01918e-05	low_activity
C	94	A	0.861108	0.131361	0.46901	non-significant
C	94	D	1.07718	0.112853	0.430591	non-significant
C	94	E	1.0744	0.117367	0.0378243	high_activity
C	94	F	1.03229	0.117753	0.910234	non-significant
C	94	G	0.973211	0.106795	0.912481	non-significant
C	94	H	0.938181	0.339191	0.622304	non-significant
C	94	I	0.881349	0.155136	0.171892	non-significant
C	94	K	0.834118	0.143557	0.110231	non-significant
C	94	L	1.00496	0.128205	0.782919	non-significant
C	94	M	1.11518	0.115866	0.198317	non-significant
C	94	N	0.9714	0.104232	0.774397	non-significant
C	94	P	0.554995	0.0916077	4.19802e-05	low_activity
C	94	Q	1.04104	0.315434	0.883207	non-significant
C	94	R	0.682546	0.317231	0.091318	non-significant
C	94	S	0.74262	0.129513	0.0503474	non-significant
C	94	T	0.874244	0.0628738	0.148059	non-significant
C	94	V	1.14702	0.203637	0.0953379	non-significant
C	94	W	1.13333	0.0950933	0.451785	non-significant
C	94	Y	0.983762	0.132978	0.883241	non-significant
R	95	A	0.655061	0.25802	0.000989414	low_activity
R	95	C	0.482613	0.0717974	0.000473864	low_activity
R	95	D	0.759041	0.12864	0.0127893	low_activity
R	95	E	0.642916	0.0862118	2.91e-07	low_activity
R	95	F	0.603932	0.209267	9.41914e-05	low_activity
R	95	G	0.677217	0.119897	0.00195479	low_activity
R	95	H	0.565287	0.205839	0.0498193	low_activity
R	95	I	0.782256	0.277963	0.0105613	low_activity
R	95	K	1.05707	0.153502	0.867593	non-significant
R	95	L	0.602334	0.179785	3.33592e-05	low_activity
R	95	M	0.659	0.176421	0.000313745	low_activity
R	95	N	0.678764	0.165629	0.000438233	low_activity
R	95	P	0.63235	0.169214	0.00687681	low_activity
R	95	Q	0.797086	0.377495	0.0219533	low_activity
R	95	S	0.807812	0.169497	0.00921758	low_activity
R	95	T	0.646775	0.180699	1.01785e-05	low_activity
R	95	V	0.629823	0.164005	0.0148958	low_activity
R	95	W	0.550321	0.112578	9.19e-07	low_activity
R	95	Y	0.695594	0.07921	0.00150339	low_activity
Q	96	A	1.0194	0.223797	0.430297	non-significant
Q	96	C	1.04496	0.140247	0.690419	non-significant
Q	96	D	0.879632	0.0712065	0.0131898	low_activity
Q	96	E	0.823911	0.143641	0.0301483	low_activity
Q	96	F	0.909056	0.210027	0.594552	non-significant
Q	96	G	0.954927	0.101266	0.644753	non-significant
Q	96	H	1.17175	0.159593	0.328505	non-significant
Q	96	I	0.966645	0.222028	0.983304	non-significant
Q	96	K	0.703674	0.426952	0.184617	non-significant
Q	96	L	0.996602	0.198029	0.491651	non-significant
Q	96	M	1.09776	0.068703	0.123316	non-significant
Q	96	N	0.993855	0.208521	0.950078	non-significant
Q	96	P	0.80203	0.182036	0.0270735	low_activity
Q	96	R	1.1256	0.131272	0.424148	non-significant
Q	96	S	1.05567	0.298757	0.903214	non-significant
Q	96	T	0.923365	0.318232	0.36068	non-significant
Q	96	V	0.973706	0.282975	0.674151	non-significant
Q	96	W	1.0649	0.133489	0.648342	non-significant
Q	96	Y	1.00527	0.14295	0.71126	non-significant
Q	97	A	0.767191	0.0802339	0.0156696	low_activity
Q	97	C	0.852021	0.150037	0.454455	non-significant
Q	97	D	0.845848	0.162796	0.200999	non-significant
Q	97	E	0.849626	0.382237	0.266015	non-significant
Q	97	G	0.889073	0.113162	0.146637	non-significant
Q	97	H	0.868816	0.177005	0.268677	non-significant
Q	97	I	1.08316	0.142493	0.521964	non-significant
Q	97	K	0.995779	0.164537	0.442491	non-significant
Q	97	M	1.03904	0.0968673	0.635906	non-significant
Q	97	N	0.914441	0.194923	0.174025	non-significant
Q	97	P	0.797211	0.0830919	0.169226	non-significant
Q	97	R	0.807074	0.136258	0.351646	non-significant
Q	97	S	1.05691	0.161445	0.677461	non-significant
Q	97	T	0.961204	0.18356	0.851615	non-significant
Q	97	V	0.903219	0.191543	0.211589	non-significant
Q	97	W	0.931623	0.22698	0.230022	non-significant
Q	97	Y	0.823289	0.239475	0.715503	non-significant
R	98	A	1.19172	0.156347	0.146148	non-significant
R	98	C	1.05287	0.155265	0.386893	non-significant
R	98	D	1.03983	0.104215	0.129141	non-significant
R	98	E	1.00689	0.236612	0.958831	non-significant
R	98	F	1.33892	0.240398	0.0578071	non-significant
R	98	G	1.14095	0.238909	0.26193	non-significant
R	98	H	1.02305	0.159023	0.868919	non-significant
R	98	I	1.12432	0.167481	0.439679	non-significant
R	98	K	0.971586	0.38963	0.528743	non-significant
R	98	M	1.15736	0.116457	0.153294	non-significant
R	98	N	1.02969	0.141594	0.426436	non-significant
R	98	P	0.908781	0.253952	0.752756	non-significant
R	98	Q	1.00466	0.0661032	0.706417	non-significant
R	98	S	0.990149	0.222422	0.812872	non-significant
R	98	T	0.915904	0.166103	0.691317	non-significant
R	98	V	0.980053	0.127262	0.996569	non-significant
R	98	W	1.23462	0.165554	0.0948617	non-significant
R	98	Y	1.13946	0.258148	0.673421	non-significant
Q	99	A	1.0846	0.0480773	0.432893	non-significant
Q	99	C	1.09709	0.104079	0.0691795	non-significant
Q	99	D	1.00547	0.339848	0.500792	non-significant
Q	99	E	1.10314	0.16484	0.327772	non-significant
Q	99	F	1.01739	0.278204	0.845862	non-significant
Q	99	G	1.08095	0.211916	0.897678	non-significant
Q	99	H	0.876069	0.084941	0.313423	non-significant
Q	99	K	0.831017	0.0939019	0.552789	non-significant
Q	99	L	0.945534	0.0941324	0.747558	non-significant
Q	99	M	0.85935	0.0623714	0.369092	non-significant
Q	99	N	1.07968	0.397521	0.851175	non-significant
Q	99	P	0.778634	0.11276	0.0251695	low_activity
Q	99	R	0.994136	0.165584	0.668747	non-significant
Q	99	S	0.856469	0.21441	0.640823	non-significant
Q	99	T	1.15441	0.400147	0.676809	non-significant
Q	99	V	1.03615	0.116532	0.990004	non-significant
Q	99	W	0.918494	0.345335	0.333019	non-significant
Q	99	Y	0.83109	0.0973518	0.306575	non-significant
Q	100	A	0.903521	0.280027	0.835092	non-significant
Q	100	C	0.883633	0.16306	0.20079	non-significant
Q	100	D	0.947258	0.311411	0.934098	non-significant
Q	100	E	0.852755	0.213094	0.207001	non-significant
Q	100	F	0.508207	0.153114	0.000133809	low_activity
Q	100	G	0.828816	0.197717	0.0372272	low_activity
Q	100	H	0.88959	0.182863	0.537188	non-significant
Q	100	I	0.926637	0.0981416	0.794389	non-significant
Q	100	K	0.948837	0.246903	0.646471	non-significant
Q	100	M	1.00318	0.188336	0.370598	non-significant
Q	100	N	0.950227	0.0799525	0.304549	non-significant
Q	100	P	0.87735	0.188002	0.702804	non-significant
Q	100	R	0.875202	0.0741584	0.160586	non-significant
Q	100	S	0.998331	0.0309279	0.395687	non-significant
Q	100	T	1.02386	0.214898	0.895984	non-significant
Q	100	V	0.888822	0.197407	0.653861	non-significant
Q	100	W	0.910824	0.0575585	0.742666	non-significant
Q	100	Y	0.962369	0.190592	0.753792	non-significant
Q	101	A	1.08295	0.39231	0.984296	non-significant
Q	101	C	1.04352	0.128833	0.690329	non-significant
Q	101	D	0.73169	0.0799132	0.00132755	low_activity
Q	101	E	1.15242	0.0816996	0.260505	non-significant
Q	101	F	0.756288	0.123786	0.0855567	non-significant
Q	101	G	0.886258	0.13054	0.239028	non-significant
Q	101	H	0.927673	0.248474	0.909626	non-significant
Q	101	I	0.593956	0.0444111	0.00279916	low_activity
Q	101	K	0.707026	0.171135	0.0767214	non-significant
Q	101	L	0.804181	0.0783517	0.0567003	non-significant
Q	101	M	1.10564	0.139234	0.424148	non-significant
Q	101	N	0.922805	0.203505	0.157569	non-significant
Q	101	P	0.803428	0.37448	0.145777	non-significant
Q	101	R	0.840054	0.0642084	0.260822	non-significant
Q	101	S	0.749267	0.21712	0.231277	non-significant
Q	101	T	1.07243	0.144405	0.921289	non-significant
Q	101	V	0.874188	0.118037	0.0747317	non-significant
Q	101	W	1.10456	0.10775	0.297685	non-significant
Q	101	Y	1.00559	0.167301	0.54546	non-significant
K	102	A	0.97509	0.242512	0.925355	non-significant
K	102	C	1.07375	0.197606	0.327513	non-significant
K	102	D	1.1144	0.134309	0.123729	non-significant
K	102	E	1.22239	0.187459	0.316467	non-significant
K	102	F	1.53758	0.266532	4.51465e-05	high_activity
K	102	G	1.24994	0.391524	0.263715	non-significant
K	102	H	1.35805	0.151162	0.0835435	non-significant
K	102	I	1.35065	0.291553	0.0121925	high_activity
K	102	L	1.06907	0.154596	0.515452	non-significant
K	102	M	1.13312	0.151278	0.0633247	non-significant
K	102	N	1.11732	0.150698	0.839027	non-significant
K	102	P	0.956157	0.137227	0.306509	non-significant
K	102	Q	1.22677	0.238321	0.0977358	non-significant
K	102	R	0.939598	0.115999	0.798447	non-significant
K	102	T	1.05697	0.285152	0.312042	non-significant
K	102	V	1.09426	0.26516	0.98207	non-significant
K	102	W	1.43708	0.319365	0.000789816	high_activity
K	102	Y	1.23288	0.364373	0.216471	non-significant
Q	103	A	0.940523	0.237272	0.816489	non-significant
Q	103	C	1.07003	0.219514	0.837413	non-significant
Q	103	D	1.01039	0.222395	0.763087	non-significant
Q	103	E	1.082	0.0644994	0.339417	non-significant
Q	103	G	0.999977	0.262422	0.857467	non-significant
Q	103	H	0.912435	0.0936563	0.30741	non-significant
Q	103	I	1.01353	0.2847	0.716241	non-significant
Q	103	K	0.897592	0.238954	0.968189	non-significant
Q	103	L	0.98781	0.248363	0.909626	non-significant
Q	103	M	1.01172	0.137821	0.496537	non-significant
Q	103	N	0.900855	0.160753	0.717538	non-significant
Q	103	R	0.650972	0.224758	0.000280699	low_activity
Q	103	S	0.992241	0.105458	0.971164	non-significant
Q	103	T	1.22687	0.80679	0.260822	non-significant
Q	103	V	0.990174	0.172804	0.974747	non-significant
Q	103	W	1.14331	0.294306	0.043759	high_activity
Q	103	Y	0.993192	0.151702	0.599945	non-significant
Q	104	A	1.05672	0.362883	0.829788	non-significant
Q	104	C	0.928095	0.0987894	0.841541	non-significant
Q	104	D	1.00912	0.157109	0.786685	non-significant
Q	104	E	1.05213	0.170438	0.5832	non-significant
Q	104	F	0.98763	0.312854	0.819379	non-significant
Q	104	G	1.05333	0.119353	0.834422	non-significant
Q	104	H	0.909134	0.203558	0.482258	non-significant
Q	104	I	1.00863	0.0992209	0.823664	non-significant
Q	104	L	1.09157	0.277246	0.403054	non-significant
Q	104	M	0.932828	0.217296	0.629635	non-significant
Q	104	N	0.914071	0.364537	0.503591	non-significant
Q	104	P	1.01701	0.199434	0.814944	non-significant
Q	104	R	0.696179	0.102145	0.0367404	low_activity
Q	104	S	0.855259	0.277612	0.202069	non-significant
Q	104	T	0.890982	0.358972	0.739573	non-significant
Q	104	V	0.915472	0.106111	0.754572	non-significant
Q	104	W	1.15391	0.15297	0.154781	non-significant
Q	104	Y	0.963856	0.178769	0.823468	non-significant
Q	105	A	0.948218	0.334099	0.567838	non-significant
Q	105	C	0.843296	0.161968	0.135165	non-significant
Q	105	D	1.11231	0.221254	0.230829	non-significant
Q	105	E	1.04305	0.326826	0.979092	non-significant
Q	105	F	1.0955	0.409386	0.944682	non-significant
Q	105	G	0.936889	0.217719	0.825435	non-significant
Q	105	H	0.867254	0.141837	0.250104	non-significant
Q	105	I	1.11463	0.110602	0.770785	non-significant
Q	105	K	0.874294	0.161484	0.144085	non-significant
Q	105	M	1.01326	0.219904	0.834275	non-significant
Q	105	N	1.13991	0.13289	0.361187	non-significant
Q	105	P	1.0991	0.204251	0.36334	non-significant
Q	105	R	0.754462	0.0889248	0.15358	non-significant
Q	105	S	0.983337	0.156652	0.972921	non-significant
Q	105	T	1.13264	0.33303	0.235409	non-significant
Q	105	V	1.01676	0.115932	0.912886	non-significant
Q	105	W	1.03138	0.152025	0.567423	non-significant
Q	105	Y	1.18408	0.209424	0.35701	non-significant
Q	106	A	0.992484	0.144581	0.806521	non-significant
Q	106	C	0.988943	0.168067	0.8033	non-significant
Q	106	D	1.12086	0.381349	0.229504	non-significant
Q	106	E	1.08684	0.166538	0.583871	non-significant
Q	106	F	0.95487	0.239383	0.340033	non-significant
Q	106	G	1.12555	0.174385	0.656426	non-significant
Q	106	H	0.982869	0.214428	0.953183	non-significant
Q	106	I	1.23605	0.145565	0.168976	non-significant
Q	106	K	0.810648	0.198476	0.0518938	non-significant
Q	106	L	0.594098	0.192813	0.0763139	non-significant
Q	106	M	0.927622	0.0389666	0.912481	non-significant
Q	106	N	0.924551	0.105055	0.449107	non-significant
Q	106	P	1.06962	0.334253	0.947837	non-significant
Q	106	R	0.890512	0.20012	0.366862	non-significant
Q	106	S	1.14824	0.274646	0.113124	non-significant
Q	106	T	1.15975	0.269247	0.437761	non-significant
Q	106	V	0.954535	0.178549	0.968993	non-significant
Q	106	W	1.00786	0.24703	0.986072	non-significant
Q	106	Y	0.848944	0.0752967	0.461755	non-significant
P	107	A	1.0268	0.182404	0.829416	non-significant
P	107	C	1.04694	0.16304	0.829416	non-significant
P	107	D	1.09371	0.0298662	0.262018	non-significant
P	107	E	1.0099	0.279096	0.571131	non-significant
P	107	F	1.10809	0.0905951	0.321785	non-significant
P	107	G	0.927882	0.154742	0.873464	non-significant
P	107	H	1.02578	0.104615	0.366538	non-significant
P	107	I	1.02819	0.383717	0.546737	non-significant
P	107	K	1.03544	0.401436	0.901951	non-significant
P	107	L	0.956459	0.339655	0.989631	non-significant
P	107	M	0.993118	0.18306	0.726073	non-significant
P	107	N	1.02908	0.297914	0.78712	non-significant
P	107	Q	0.941911	0.29119	0.518634	non-significant
P	107	R	0.718327	0.242671	0.0663433	non-significant
P	107	S	0.972478	0.0912804	0.923336	non-significant
P	107	T	0.979974	0.0718558	0.677611	non-significant
P	107	V	1.10413	0.170488	0.221729	non-significant
P	107	W	0.908817	0.496274	0.330195	non-significant
P	107	Y	1.10556	0.265159	0.19818	non-significant
P	108	A	1.08884	0.317217	0.416204	non-significant
P	108	C	0.914298	0.100721	0.449268	non-significant
P	108	D	1.03537	0.100213	0.208959	non-significant
P	108	E	1.17586	0.135472	0.0981426	non-significant
P	108	F	1.0991	0.208686	0.462093	non-significant
P	108	G	1.00284	0.197724	0.88002	non-significant
P	108	H	0.974418	0.393706	0.901041	non-significant
P	108	I	0.968089	0.205246	0.776593	non-significant
P	108	K	0.686602	0.0388626	0.00700132	low_activity
P	108	L	1.10018	0.172103	0.333128	non-significant
P	108	M	0.752527	0.190867	0.265113	non-significant
P	108	N	1.01072	0.121639	0.636636	non-significant
P	108	R	0.777039	0.0512822	0.112005	non-significant
P	108	S	0.854882	0.36769	0.810685	non-significant
P	108	T	0.967949	0.284981	0.883241	non-significant
P	108	W	1.0903	0.197353	0.549709	non-significant
P	108	Y	1.10268	0.0655926	0.253116	non-significant
G	109	A	0.872785	0.250155	0.766645	non-significant
G	109	C	1.17711	0.36457	0.8307	non-significant
G	109	D	0.83146	0.172873	0.452347	non-significant
G	109	E	1.17218	0.163006	0.301253	non-significant
G	109	F	1.04975	0.366399	0.89866	non-significant
G	109	H	0.906754	0.10788	0.648036	non-significant
G	109	I	1.06201	0.451546	0.791319	non-significant
G	109	K	0.819536	0.228547	0.37041	non-significant
G	109	L	1.11873	0.150021	0.200654	non-significant
G	109	M	1.27491	0.310537	0.225413	non-significant
G	109	N	0.929555	0.080281	0.777749	non-significant
G	109	P	0.840179	0.176286	0.631207	non-significant
G	109	Q	0.853675	0.246792	0.725323	non-significant
G	109	R	0.742822	0.165728	0.428594	non-significant
G	109	S	1.05689	0.0778725	0.575846	non-significant
G	109	T	1.15148	0.117992	0.0704057	non-significant
G	109	V	1.08972	0.184905	0.570196	non-significant
G	109	W	1.17422	0.223574	0.43627	non-significant
G	109	Y	1.10136	0.216227	0.764063	non-significant
G	110	A	1.06704	0.159869	0.749032	non-significant
G	110	C	0.911374	0.152099	0.503591	non-significant
G	110	D	1.10441	0.240471	0.474026	non-significant
G	110	E	1.13995	0.174555	0.282467	non-significant
G	110	F	1.33537	0.273517	0.0285878	high_activity
G	110	H	0.913661	0.147906	0.798747	non-significant
G	110	I	0.91264	0.0324721	0.315723	non-significant
G	110	K	0.797043	0.094975	0.153294	non-significant
G	110	M	1.22127	0.0444961	0.0782568	non-significant
G	110	N	1.16319	0.197372	0.321621	non-significant
G	110	R	0.910756	0.141204	0.51525	non-significant
G	110	S	1.00913	0.162854	0.883241	non-significant
G	110	T	1.13359	0.158105	0.737312	non-significant
G	110	V	1.28556	0.407831	0.0143203	high_activity
G	110	W	1.1319	0.357419	0.569932	non-significant
G	110	Y	1.10147	0.313742	0.569603	non-significant
Q	111	E	0.909107	0.0670533	0.563289	non-significant
Q	111	G	1.02969	0.254794	0.783406	non-significant
Q	111	H	1.18181	0.19266	0.40842	non-significant
Q	111	K	0.961652	0.261418	0.4958	non-significant
Q	111	N	1.13201	0.242077	0.462554	non-significant
Q	111	P	1.17344	0.328334	0.385384	non-significant
Q	111	R	0.884604	0.162579	0.532738	non-significant
Q	111	V	0.843127	0.34281	0.498653	non-significant
[truncated: 3,286 more rows]
